# Supplementary material for: Prevalence of depression among Chinese university students: a systematic review and meta-analysis
Source: PubMed Central journal article supplement (PMC7522998; doi:10.1038/s41598-020-72998-1), 2020-09-28
Supplement: 41598_2020_72998_MOESM1_ESM.pdf [file 41598_2020_72998_MOESM1_ESM.pdf]

# Prevalence of depression among Chinese university students: A systematic review and meta-analysis

Li Gao<sup>1,2,\*</sup>, Yuanchen Xie<sup>3</sup>, Chunhua Jia<sup>1</sup>, Wei Wang<sup>1,\*</sup>

<sup>1</sup> Beijing University of Chinese Medicine, Beijing 100029, China

<sup>2</sup> St Michael's Hospital, University of Toronto, Toronto M5B 1W8, Canada

<sup>3</sup> Zhengzhou University, Zhengzhou 450052, China

\* Corresponding author 1: Li Gao, E-mail: gaol@bucm.edu.cn;

\* Corresponding author 2: Wei Wang, E-mail: wangwei@bucm.edu.cn;

## Appendix

|                                                                                                                         |    |
|-------------------------------------------------------------------------------------------------------------------------|----|
| <b>Appendix-Method 1</b> Database search strategies in detail.....                                                      | 3  |
| <b>Appendix-Method 2</b> Modified Newcastle-Ottawa risk of bias scoring guide.....                                      | 5  |
| <b>Appendix-Table 1</b> Details of the qualities of the studies assessed by the modified<br>Newcastle-Ottawa scale..... | 7  |
| <b>Appendix-Table 2</b> Sensitivity analysis of the depression prevalence among Chinese<br>university students .....    | 10 |
| <b>Appendix-Fig. 1</b> Forest plot of the 113 studies (Studies of 1-40) .....                                           | 13 |
| <b>Appendix-Fig. 2</b> Forest plot of the 113 studies (Studies of 41-80) .....                                          | 14 |
| <b>Appendix-Fig. 3</b> Forest plot of the 113 studies (Studies of 81-113).....                                          | 15 |
| <b>Appendix-Fig. 4</b> Subgroup analysis of gender .....                                                                | 16 |
| <b>Appendix-Fig. 5</b> Subgroup analysis of family origin.....                                                          | 17 |
| <b>Appendix-Fig. 6</b> Subgroup analysis of academic grade .....                                                        | 18 |
| <b>Appendix-Fig. 7</b> Subgroup analysis of only-child or not.....                                                      | 19 |
| <b>Appendix-Fig. 8</b> Subgroup analysis of ethnic group.....                                                           | 20 |
| <b>Appendix-Fig. 9</b> Subgroup analysis of medical students or not .....                                               | 21 |
| <b>Appendix-Fig. 10</b> Subgroup analysis of dating relationship .....                                                  | 22 |

|                                                                                        |    |
|----------------------------------------------------------------------------------------|----|
| <b>Appendix-Fig. 11</b> Subgroup analysis of religious belief .....                    | 23 |
| <b>Appendix-Fig. 12</b> Subgroup analysis of left-behind experiences on childhood..... | 24 |
| <b>Appendix-Fig. 13</b> Subgroup analysis of educational level of father.....          | 25 |
| <b>Appendix-Fig. 14</b> Subgroup analysis of educational level of mother .....         | 26 |
| <b>Appendix-Fig. 15</b> Subgroup analysis of smoking or not.....                       | 27 |
| <b>References</b> .....                                                                | 28 |

## Appendix-Method 1 Database search strategies in detail

### Web of Science

(depression OR depressive symptom OR depressive disorder OR depressive neurosis OR melancholia)

AND (China OR Chinese)

AND (college student OR university student OR undergraduate student)

AND (observation OR survey OR prevalence OR incidence OR epidemiology OR questionnaire)

(Searched in topic)

### PubMed

(((((("depression"[Title/Abstract] OR "depressive symptom"[Title/Abstract]) OR "depressive disorder"[Title/Abstract]) OR "depressive neurosis"[Title/Abstract]) OR (((("depressive disorder"[MeSH Terms] OR ("depressive"[All Fields] AND "disorder"[All Fields])) OR "depressive disorder"[All Fields]) OR "melancholia"[All Fields] OR "melancholias"[All Fields])) AND ("China"[Title/Abstract] OR (((("asian continental ancestry group"[MeSH Terms] OR ((("asian"[All Fields] AND "continental"[All Fields]) AND "ancestry"[All Fields]) AND "group"[All Fields])) OR "asian continental ancestry group"[All Fields]) OR "chinese"[All Fields] OR "chineses"[All Fields]))) AND (("college student\*"[Title/Abstract] OR "university student\*"[Title/Abstract]) OR (((("undergraduate"[All Fields] OR "undergraduate s"[All Fields]) OR "undergraduated"[All Fields]) OR "undergraduates"[All Fields]) AND "student\*"[All Fields]))) AND (((("observation"[Title/Abstract] OR "survey"[Title/Abstract]) OR "prevalence"[Title/Abstract]) OR "incidence"[Title/Abstract]) OR "epidemiology"[Title/Abstract]) OR (((("questionair"[All Fields] OR "questionnaires"[All Fields]) OR "surveys and questionnaires"[MeSH Terms]) OR ("surveys"[All Fields] AND "questionnaires"[All Fields])) OR "surveys and questionnaires"[All Fields]) OR "questionnaire"[All Fields] OR "questionnaires"[All Fields]))

**Chinese National Knowledge Infrastructure (a Chinese database)**

(抑郁 OR 抑郁症 OR 抑郁性神经症 OR 忧郁症) AND (大学生 OR 高校学生 OR 本科生) AND (调查问卷 OR 发病率 OR 流行病学 OR 横断面研究)

(Searched in Topic)

**Wan-fang Database (a Chinese database)**

(抑郁 OR 抑郁症 OR 抑郁性神经症 OR 忧郁症) AND (大学生 OR 高校学生 OR 本科生) AND (调查问卷 OR 发病率 OR 流行病学 OR 横断面研究)

(Searched in Topic)

## **Appendix-Method 2** Modified Newcastle-Ottawa risk of bias scoring guide

### **(1) Sample representativeness:**

1 point: Population contained students of multiple majors and grades in multiple universities.

0 points: Population contained students only in a single major, a single grade, or a single university.

### **(2) Sample size:**

1 point: Sample size was greater than or equal to 200 participants.

0 points: Sample size was less than 200 participants.

### **(3) Non-respondents:**

1 point: Comparability between respondent and non-respondent characteristics was established with a satisfactory response rate.

0 points: The comparability between respondents and non-respondents was unsatisfactory, the response rate was unsatisfactory, or there was no description of the response rate or the characteristics of the responders or non-responders.

### **(4) Ascertainment of depression or depressive symptoms:**

1 point: The study employed a commonly used measurement tool with a valid cutoff score (e.g., BDI  $\geq 10$ , BDI-II  $\geq 14$ , CES-D  $\geq 16$ , PHQ-9  $\geq 10$ , Zung-SDS  $\geq 50$ ).

0 points: The study employed an infrequently used measurement tool, a commonly used measurement tool with an invalid cutoff score, or any tool with published sensitivity/specificity values  $< 70\%$  (e.g., the PRIME-MD screening instrument).

### **(5) Quality of descriptive statistics reporting:**

1 point: The study reported descriptive statistics to describe the population (e.g., age, sex, class year) with proper measures of dispersion (e.g., mean, standard deviation).

0 points: The study did not report descriptive statistics, incompletely reported descriptive statistics, or did not report measures of dispersion.

**Legend:** The individual components listed above are summed to generate a total modified Newcastle-Ottawa risk of bias score for each study. Total scores range from 0 to 5. For the total score grouping, studies were judged to be of low risk of bias ( $\geq 3$ )

points) or high risk of bias (<3 points).

**Appendix-Table 1** Details of the qualities of the studies assessed by the modified  
Newcastle-Ottawa scale

| Study ID                   | Sample representativeness | Sample size | Non-respondents | Depression ascertainment | Descriptive statistics reporting | Total score |
|----------------------------|---------------------------|-------------|-----------------|--------------------------|----------------------------------|-------------|
| Cai (2017) <sup>1</sup>    | 1                         | 1           | 1               | 1                        | 1                                | 5           |
| Chai (2011) <sup>2</sup>   | 0                         | 1           | 1               | 1                        | 0                                | 3           |
| Chan (1992) <sup>3</sup>   | 0                         | 0           | 0               | 1                        | 1                                | 2           |
| Chang (2011) <sup>4</sup>  | 0                         | 1           | 0               | 0                        | 0                                | 1           |
| Chen (2013) <sup>5</sup>   | 1                         | 1           | 1               | 1                        | 1                                | 5           |
| Chen (2015) <sup>6</sup>   | 0                         | 1           | 1               | 1                        | 0                                | 3           |
| Chen (2016) <sup>7</sup>   | 1                         | 1           | 1               | 1                        | 1                                | 5           |
| Cheung (2016) <sup>8</sup> | 0                         | 1           | 1               | 1                        | 1                                | 4           |
| Chou (2018) <sup>9</sup>   | 1                         | 1           | 1               | 1                        | 0                                | 4           |
| Deng (2011) <sup>10</sup>  | 1                         | 1           | 1               | 1                        | 1                                | 5           |
| Dong (2019) <sup>11</sup>  | 1                         | 1           | 1               | 1                        | 1                                | 5           |
| Du (1999) <sup>12</sup>    | 0                         | 1           | 0               | 1                        | 1                                | 3           |
| Fang (2017) <sup>13</sup>  | 1                         | 1           | 1               | 1                        | 0                                | 4           |
| Feng (2005) <sup>14</sup>  | 0                         | 1           | 1               | 1                        | 1                                | 4           |
| Feng (2014) <sup>15</sup>  | 0                         | 1           | 1               | 1                        | 1                                | 4           |
| Fu (2010) <sup>16</sup>    | 1                         | 1           | 1               | 1                        | 0                                | 4           |
| Gao (2008) <sup>17</sup>   | 0                         | 1           | 1               | 1                        | 1                                | 4           |
| Gao (2018) <sup>18</sup>   | 0                         | 1           | 1               | 1                        | 1                                | 4           |
| Guo (2013) <sup>19</sup>   | 1                         | 1           | 1               | 1                        | 1                                | 5           |
| Guo (2019) <sup>20</sup>   | 0                         | 1           | 0               | 1                        | 1                                | 3           |
| Guo (2020) <sup>21</sup>   | 0                         | 1           | 1               | 1                        | 1                                | 4           |
| Hall (2018) <sup>22</sup>  | 0                         | 0           | 1               | 1                        | 1                                | 3           |
| Han (2011) <sup>23</sup>   | 0                         | 1           | 1               | 1                        | 0                                | 3           |
| Han (2015) <sup>24</sup>   | 0                         | 1           | 0               | 0                        | 0                                | 1           |
| Han (2018) <sup>25</sup>   | 1                         | 1           | 1               | 1                        | 0                                | 4           |
| He (2015) <sup>26</sup>    | 1                         | 1           | 1               | 1                        | 1                                | 5           |
| Hou (2014) <sup>27</sup>   | 0                         | 1           | 0               | 0                        | 0                                | 1           |
| Hou H (2018) <sup>28</sup> | 1                         | 1           | 1               | 1                        | 1                                | 5           |
| Hou Y (2018) <sup>29</sup> | 0                         | 1           | 1               | 1                        | 0                                | 3           |
| Hu (2012) <sup>30</sup>    | 1                         | 1           | 1               | 1                        | 0                                | 4           |
| Hua (2008) <sup>31</sup>   | 0                         | 0           | 1               | 1                        | 0                                | 2           |
| Jiang (2011) <sup>32</sup> | 1                         | 1           | 1               | 1                        | 0                                | 4           |
| Jin (2014) <sup>33</sup>   | 1                         | 1           | 1               | 1                        | 0                                | 4           |
| Kang (2017) <sup>34</sup>  | 1                         | 1           | 1               | 1                        | 0                                | 4           |
| Lei (2018) <sup>35</sup>   | 1                         | 1           | 1               | 1                        | 0                                | 4           |
| Li (2018) <sup>36</sup>    | 1                         | 1           | 1               | 1                        | 0                                | 4           |
| Lin (2018) <sup>37</sup>   | 0                         | 1           | 1               | 1                        | 0                                | 3           |
| Liu (1997) <sup>38</sup>   | 0                         | 1           | 0               | 1                        | 1                                | 3           |

|                               |   |   |   |   |   |   |
|-------------------------------|---|---|---|---|---|---|
| Liu (2011) <sup>39</sup>      | 0 | 0 | 1 | 1 | 1 | 3 |
| Liu (2014) <sup>40</sup>      | 0 | 1 | 1 | 1 | 1 | 4 |
| Liu (2015) <sup>41</sup>      | 0 | 1 | 1 | 1 | 0 | 3 |
| Liu (2017) <sup>42</sup>      | 1 | 1 | 1 | 1 | 1 | 5 |
| Liu (2019) <sup>43</sup>      | 1 | 1 | 1 | 1 | 0 | 4 |
| Liu (2020) <sup>44</sup>      | 1 | 1 | 1 | 1 | 0 | 4 |
| Lu (2015) <sup>45</sup>       | 0 | 1 | 0 | 1 | 1 | 3 |
| Luo (2004) <sup>46</sup>      | 0 | 1 | 1 | 1 | 1 | 4 |
| Ma (2019) <sup>47</sup>       | 0 | 1 | 1 | 1 | 1 | 4 |
| Niu (2010) <sup>48</sup>      | 0 | 1 | 1 | 1 | 0 | 3 |
| Pan (2016) <sup>49</sup>      | 1 | 1 | 1 | 1 | 0 | 4 |
| Peng (2010) <sup>50</sup>     | 0 | 1 | 1 | 1 | 0 | 3 |
| Shao (2020) <sup>51</sup>     | 0 | 1 | 0 | 1 | 1 | 3 |
| Shen (2016) <sup>52</sup>     | 1 | 1 | 1 | 1 | 1 | 5 |
| Shi (2016) <sup>53</sup>      | 1 | 1 | 1 | 1 | 1 | 5 |
| Sobowale (2014) <sup>54</sup> | 1 | 1 | 1 | 1 | 0 | 4 |
| Song (2008) <sup>55</sup>     | 1 | 1 | 1 | 1 | 1 | 5 |
| Sun (2008) <sup>56</sup>      | 0 | 1 | 1 | 1 | 1 | 4 |
| Sun (2011) <sup>57</sup>      | 1 | 1 | 1 | 1 | 0 | 4 |
| Sun (2013) <sup>58</sup>      | 0 | 1 | 1 | 1 | 0 | 3 |
| Sun (2017) <sup>59</sup>      | 1 | 1 | 1 | 1 | 0 | 4 |
| Tan (2012) <sup>60</sup>      | 0 | 1 | 1 | 1 | 0 | 3 |
| Tang F (2018) <sup>61</sup>   | 1 | 1 | 1 | 1 | 0 | 4 |
| Tang W (2018) <sup>62</sup>   | 1 | 1 | 1 | 1 | 1 | 5 |
| Tong (2016) <sup>63</sup>     | 1 | 1 | 0 | 1 | 0 | 3 |
| Wang (2007) <sup>64</sup>     | 0 | 1 | 1 | 1 | 0 | 3 |
| Wang (2011) <sup>65</sup>     | 1 | 1 | 0 | 1 | 0 | 3 |
| Wang (2012) <sup>66</sup>     | 0 | 1 | 0 | 1 | 0 | 2 |
| Wang (2013) <sup>67</sup>     | 0 | 1 | 1 | 1 | 1 | 4 |
| Wang L (2019) <sup>68</sup>   | 1 | 1 | 0 | 0 | 0 | 2 |
| Wang M (2019) <sup>69</sup>   | 1 | 1 | 1 | 1 | 1 | 5 |
| Wang Z (2019) <sup>70</sup>   | 0 | 1 | 1 | 1 | 0 | 3 |
| Wei (2011) <sup>71</sup>      | 1 | 1 | 1 | 1 | 0 | 4 |
| Wu (2007) <sup>72</sup>       | 1 | 1 | 1 | 1 | 0 | 4 |
| Wu (2015) <sup>73</sup>       | 1 | 1 | 1 | 1 | 1 | 5 |
| Wu (2016) <sup>74</sup>       | 0 | 1 | 1 | 1 | 1 | 4 |
| Xi (2010) <sup>75</sup>       | 0 | 1 | 1 | 1 | 0 | 3 |
| Xiao (2006) <sup>76</sup>     | 1 | 1 | 1 | 1 | 1 | 5 |
| Xiao (2016) <sup>77</sup>     | 1 | 1 | 1 | 1 | 0 | 4 |
| Xu (2002) <sup>78</sup>       | 0 | 1 | 1 | 1 | 1 | 4 |
| Xu (2003) <sup>79</sup>       | 0 | 1 | 0 | 1 | 1 | 3 |
| Xu (2014) <sup>80</sup>       | 1 | 1 | 1 | 1 | 1 | 5 |
| Xu (2016) <sup>81</sup>       | 1 | 1 | 1 | 1 | 1 | 5 |
| Xu (2020) <sup>82</sup>       | 1 | 1 | 1 | 1 | 1 | 5 |



|                                  |   |   |   |   |   |   |
|----------------------------------|---|---|---|---|---|---|
| Yang (2008) <sup>83</sup>        | 0 | 1 | 1 | 1 | 0 | 3 |
| Yang C (2013) <sup>84</sup>      | 0 | 1 | 1 | 1 | 1 | 4 |
| Yang H (2013) <sup>85</sup>      | 0 | 1 | 1 | 1 | 0 | 3 |
| Yang M (2007) <sup>86</sup>      | 0 | 0 | 1 | 1 | 0 | 2 |
| Yang X (2007) <sup>87</sup>      | 0 | 1 | 1 | 1 | 1 | 4 |
| Ye (2016) <sup>88</sup>          | 1 | 1 | 0 | 1 | 1 | 4 |
| Yen (2011) <sup>89</sup>         | 1 | 1 | 1 | 1 | 1 | 5 |
| Yu (2011) <sup>90</sup>          | 0 | 1 | 1 | 1 | 0 | 3 |
| Yu (2015) <sup>91</sup>          | 1 | 1 | 1 | 1 | 0 | 4 |
| Zeng (2003) <sup>92</sup>        | 0 | 1 | 1 | 1 | 1 | 4 |
| Zeng (2006) <sup>93</sup>        | 0 | 1 | 1 | 1 | 0 | 3 |
| Zeng (2019) <sup>94</sup>        | 1 | 1 | 1 | 0 | 1 | 4 |
| Zhai (2005) <sup>95</sup>        | 0 | 1 | 1 | 1 | 1 | 4 |
| Zhang (2004) <sup>96</sup>       | 1 | 1 | 0 | 1 | 1 | 4 |
| Zhang (2005) <sup>97</sup>       | 0 | 1 | 0 | 1 | 1 | 3 |
| Zhang (2006) <sup>98</sup>       | 1 | 1 | 1 | 1 | 1 | 5 |
| Zhang (2015) <sup>99</sup>       | 1 | 1 | 1 | 1 | 1 | 5 |
| Zhang (2018) <sup>100</sup>      | 0 | 1 | 0 | 1 | 1 | 3 |
| Zhang (2020) <sup>101</sup>      | 0 | 1 | 1 | 1 | 1 | 4 |
| Zhao (2018) <sup>102</sup>       | 1 | 1 | 1 | 1 | 1 | 5 |
| Zheng (2008) <sup>103</sup>      | 0 | 1 | 1 | 1 | 1 | 4 |
| Zheng (2016) <sup>104</sup>      | 0 | 1 | 1 | 1 | 1 | 4 |
| Zhong (2011) <sup>105</sup>      | 0 | 1 | 1 | 1 | 0 | 3 |
| Zhou (2003) <sup>106</sup>       | 0 | 0 | 1 | 1 | 1 | 3 |
| Zhou (2009) <sup>107</sup>       | 0 | 1 | 1 | 1 | 1 | 4 |
| Zhou (2018) <sup>108</sup>       | 1 | 1 | 1 | 1 | 0 | 4 |
| Zhu (2019) <sup>109</sup>        | 0 | 1 | 1 | 1 | 1 | 4 |
| Zong (2010) <sup>110</sup>       | 1 | 1 | 1 | 1 | 0 | 4 |
| Zou (2007) <sup>111</sup>        | 0 | 1 | 1 | 1 | 1 | 4 |
| Zou & Sun (2018) <sup>112</sup>  | 1 | 1 | 0 | 1 | 1 | 4 |
| Zou & Wang (2018) <sup>113</sup> | 0 | 1 | 1 | 1 | 1 | 4 |

---

**Appendix-Table 2** Sensitivity analysis of the depression prevalence among Chinese university students

| Study Omitted              | Prevalence (%) | LCI (%) | UCI (%) | $\tau^2$ | I <sup>2</sup> (%) |
|----------------------------|----------------|---------|---------|----------|--------------------|
| Cai (2017) <sup>1</sup>    | 28.4           | 25.7    | 31.1    | 0.0215   | 99.6               |
| Chai (2011) <sup>2</sup>   | 28.5           | 25.7    | 31.2    | 0.0216   | 99.6               |
| Chan (1992) <sup>3</sup>   | 28.5           | 25.8    | 31.3    | 0.0215   | 99.6               |
| Chang (2011) <sup>4</sup>  | 28.3           | 25.6    | 31.1    | 0.0215   | 99.6               |
| Chen (2013) <sup>5</sup>   | 28.6           | 25.8    | 31.4    | 0.0221   | 99.6               |
| Chen (2015) <sup>6</sup>   | 28.4           | 25.7    | 31.1    | 0.0215   | 99.6               |
| Chen (2016) <sup>7</sup>   | 28.4           | 25.7    | 31.2    | 0.0215   | 99.6               |
| Cheung (2016) <sup>8</sup> | 28.4           | 25.6    | 31.1    | 0.0215   | 99.6               |
| Chou (2018) <sup>9</sup>   | 28.4           | 25.7    | 31.2    | 0.0215   | 99.6               |
| Deng (2011) <sup>10</sup>  | 28.5           | 25.7    | 31.2    | 0.0217   | 99.6               |
| Dong (2019) <sup>11</sup>  | 28.4           | 25.7    | 31.1    | 0.0215   | 99.6               |
| Du (1999) <sup>12</sup>    | 28.3           | 25.6    | 31.0    | 0.0213   | 99.6               |
| Fang (2017) <sup>13</sup>  | 28.1           | 25.5    | 30.8    | 0.0208   | 99.6               |
| Feng (2005) <sup>14</sup>  | 28.5           | 25.8    | 31.3    | 0.0215   | 99.6               |
| Feng (2014) <sup>15</sup>  | 28.6           | 25.8    | 31.3    | 0.0216   | 99.6               |
| Fu (2010) <sup>16</sup>    | 28.2           | 25.5    | 31.0    | 0.0213   | 99.6               |
| Gao (2008) <sup>17</sup>   | 28.4           | 25.7    | 31.1    | 0.0215   | 99.6               |
| Gao (2018) <sup>18</sup>   | 28.5           | 25.8    | 31.3    | 0.0216   | 99.6               |
| Guo (2013) <sup>19</sup>   | 28.3           | 25.6    | 31.0    | 0.0214   | 99.6               |
| Guo (2019) <sup>20</sup>   | 28.3           | 25.6    | 31.0    | 0.0214   | 99.6               |
| Guo (2020) <sup>21</sup>   | 28.5           | 25.7    | 31.2    | 0.0218   | 99.6               |
| Hall (2018) <sup>22</sup>  | 28.2           | 25.5    | 30.9    | 0.0214   | 99.6               |
| Han (2011) <sup>23</sup>   | 28.5           | 25.8    | 31.2    | 0.0215   | 99.6               |
| Han (2015) <sup>24</sup>   | 28.6           | 25.9    | 31.4    | 0.0216   | 99.6               |
| Han (2018) <sup>25</sup>   | 28.4           | 25.6    | 31.1    | 0.0215   | 99.6               |
| He (2015) <sup>26</sup>    | 28.4           | 25.6    | 31.1    | 0.0215   | 99.6               |
| Hou (2014) <sup>27</sup>   | 28.7           | 25.9    | 31.4    | 0.0213   | 99.6               |
| Hou H (2018) <sup>28</sup> | 28.6           | 25.8    | 31.4    | 0.0220   | 99.6               |
| Hou Y (2018) <sup>29</sup> | 28.6           | 25.8    | 31.3    | 0.0218   | 99.6               |
| Hu (2012) <sup>30</sup>    | 28.4           | 25.7    | 31.1    | 0.0215   | 99.6               |
| Hua (2008) <sup>31</sup>   | 28.5           | 25.7    | 31.2    | 0.0215   | 99.6               |
| Jiang (2011) <sup>32</sup> | 28.4           | 25.7    | 31.1    | 0.0215   | 99.6               |
| Jin (2014) <sup>33</sup>   | 28.4           | 25.6    | 31.1    | 0.0214   | 99.6               |
| Kang (2017) <sup>34</sup>  | 28.5           | 25.8    | 31.2    | 0.0215   | 99.6               |
| Lei (2018) <sup>35</sup>   | 28.6           | 25.9    | 31.4    | 0.0220   | 99.6               |
| Li (2018) <sup>36</sup>    | 28.4           | 25.7    | 31.1    | 0.0215   | 99.6               |
| Lin (2018) <sup>37</sup>   | 28.6           | 25.8    | 31.3    | 0.0216   | 99.6               |
| Liu (1997) <sup>38</sup>   | 28.5           | 25.8    | 31.3    | 0.0215   | 99.6               |
| Liu (2011) <sup>39</sup>   | 28.4           | 25.7    | 31.2    | 0.0215   | 99.6               |
| Liu (2014) <sup>40</sup>   | 28.3           | 25.6    | 31.1    | 0.0214   | 99.6               |

|                               |      |      |      |        |      |
|-------------------------------|------|------|------|--------|------|
| Liu (2015) <sup>41</sup>      | 28.5 | 25.8 | 31.3 | 0.0216 | 99.6 |
| Liu (2017) <sup>42</sup>      | 28.5 | 25.8 | 31.2 | 0.0216 | 99.6 |
| Liu (2019) <sup>43</sup>      | 28.4 | 25.6 | 31.1 | 0.0214 | 99.6 |
| Liu (2020) <sup>44</sup>      | 28.5 | 25.8 | 31.3 | 0.0216 | 99.6 |
| Lu (2015) <sup>45</sup>       | 28.1 | 25.4 | 30.8 | 0.0208 | 99.6 |
| Luo (2004) <sup>46</sup>      | 28.2 | 25.5 | 30.9 | 0.0214 | 99.6 |
| Ma (2019) <sup>47</sup>       | 28.5 | 25.8 | 31.3 | 0.0216 | 99.6 |
| Niu (2010) <sup>48</sup>      | 28.5 | 25.8 | 31.2 | 0.0215 | 99.6 |
| Pan (2016) <sup>49</sup>      | 28.5 | 25.7 | 31.3 | 0.0223 | 99.6 |
| Peng (2010) <sup>50</sup>     | 28.2 | 25.5 | 30.9 | 0.0211 | 99.6 |
| Shao (2020) <sup>51</sup>     | 28.2 | 25.5 | 30.8 | 0.0207 | 99.6 |
| Shen (2016) <sup>52</sup>     | 28.4 | 25.7 | 31.1 | 0.0215 | 99.6 |
| Shi (2016) <sup>53</sup>      | 28.1 | 25.5 | 30.7 | 0.0194 | 99.6 |
| Sobowale (2014) <sup>54</sup> | 28.1 | 25.4 | 30.8 | 0.0213 | 99.6 |
| Song (2008) <sup>55</sup>     | 28.4 | 25.7 | 31.1 | 0.0215 | 99.6 |
| Sun (2008) <sup>56</sup>      | 28.6 | 25.9 | 31.4 | 0.0215 | 99.6 |
| Sun (2011) <sup>57</sup>      | 28.5 | 25.7 | 31.3 | 0.0226 | 99.6 |
| Sun (2013) <sup>58</sup>      | 28.0 | 25.3 | 30.7 | 0.0207 | 99.6 |
| Sun (2017) <sup>59</sup>      | 28.6 | 25.8 | 31.4 | 0.0222 | 99.6 |
| Tan (2012) <sup>60</sup>      | 28.5 | 25.8 | 31.3 | 0.0215 | 99.6 |
| Tang F (2018) <sup>61</sup>   | 28.5 | 25.7 | 31.3 | 0.0221 | 99.6 |
| Tang W (2018) <sup>62</sup>   | 28.4 | 25.6 | 31.1 | 0.0214 | 99.6 |
| Tong (2016) <sup>63</sup>     | 28.5 | 25.8 | 31.3 | 0.0217 | 99.6 |
| Wang (2007) <sup>64</sup>     | 28.4 | 25.7 | 31.2 | 0.0215 | 99.6 |
| Wang (2011) <sup>65</sup>     | 28.6 | 25.9 | 31.4 | 0.0215 | 99.6 |
| Wang (2012) <sup>66</sup>     | 28.5 | 25.8 | 31.2 | 0.0215 | 99.6 |
| Wang (2013) <sup>67</sup>     | 28.5 | 25.7 | 31.2 | 0.0216 | 99.6 |
| Wang L (2019) <sup>68</sup>   | 28.6 | 25.8 | 31.3 | 0.0217 | 99.6 |
| Wang M (2019) <sup>69</sup>   | 28.5 | 25.7 | 31.2 | 0.0219 | 99.6 |
| Wang Z (2019) <sup>70</sup>   | 28.4 | 25.6 | 31.1 | 0.0215 | 99.6 |
| Wei (2011) <sup>71</sup>      | 28.3 | 25.6 | 31.1 | 0.0215 | 99.6 |
| Wu (2007) <sup>72</sup>       | 28.5 | 25.7 | 31.2 | 0.0216 | 99.6 |
| Wu (2015) <sup>73</sup>       | 28.5 | 25.8 | 31.3 | 0.0220 | 99.6 |
| Wu (2016) <sup>74</sup>       | 28.5 | 25.8 | 31.3 | 0.0218 | 99.6 |
| Xi (2010) <sup>75</sup>       | 28.5 | 25.8 | 31.2 | 0.0215 | 99.6 |
| Xiao (2006) <sup>76</sup>     | 28.3 | 25.6 | 31.1 | 0.0214 | 99.6 |
| Xiao (2016) <sup>77</sup>     | 28.5 | 25.8 | 31.2 | 0.0215 | 99.6 |
| Xu (2002) <sup>78</sup>       | 28.6 | 25.8 | 31.3 | 0.0215 | 99.6 |
| Xu (2003) <sup>79</sup>       | 28.5 | 25.7 | 31.2 | 0.0216 | 99.6 |
| Xu (2014) <sup>80</sup>       | 28.5 | 25.7 | 31.2 | 0.0215 | 99.6 |
| Xu (2016) <sup>81</sup>       | 28.4 | 25.7 | 31.2 | 0.0215 | 99.6 |
| Xu (2020) <sup>82</sup>       | 28.3 | 25.6 | 31.0 | 0.0208 | 99.6 |
| Yang (2008) <sup>83</sup>     | 28.3 | 25.6 | 31.0 | 0.0214 | 99.6 |
| Yang C (2013) <sup>84</sup>   | 28.2 | 25.5 | 30.9 | 0.0212 | 99.6 |

---

|                                  |      |      |      |        |      |
|----------------------------------|------|------|------|--------|------|
| Yang H (2013) <sup>85</sup>      | 28.3 | 25.6 | 31.0 | 0.0213 | 99.6 |
| Yang M (2007) <sup>86</sup>      | 28.3 | 25.6 | 31.0 | 0.0215 | 99.6 |
| Yang X (2007) <sup>87</sup>      | 28.7 | 26.0 | 31.4 | 0.0210 | 99.6 |
| Ye (2016) <sup>88</sup>          | 28.4 | 25.6 | 31.1 | 0.0215 | 99.6 |
| Yen (2011) <sup>89</sup>         | 28.6 | 25.8 | 31.3 | 0.0218 | 99.6 |
| Yu (2011) <sup>90</sup>          | 28.5 | 25.7 | 31.2 | 0.0215 | 99.6 |
| Yu (2015) <sup>91</sup>          | 28.6 | 25.8 | 31.4 | 0.0220 | 99.6 |
| Zeng (2003) <sup>92</sup>        | 28.6 | 25.8 | 31.3 | 0.0215 | 99.6 |
| Zeng (2006) <sup>93</sup>        | 28.2 | 25.5 | 31.0 | 0.0214 | 99.6 |
| Zeng (2019) <sup>94</sup>        | 28.4 | 25.7 | 31.2 | 0.0215 | 99.6 |
| Zhai (2005) <sup>95</sup>        | 28.5 | 25.7 | 31.2 | 0.0215 | 99.6 |
| Zhang (2004) <sup>96</sup>       | 28.6 | 25.9 | 31.4 | 0.0215 | 99.6 |
| Zhang (2005) <sup>97</sup>       | 28.3 | 25.6 | 31.0 | 0.0213 | 99.6 |
| Zhang (2006) <sup>98</sup>       | 28.0 | 25.3 | 30.6 | 0.0200 | 99.6 |
| Zhang (2015) <sup>99</sup>       | 28.5 | 25.7 | 31.2 | 0.0216 | 99.6 |
| Zhang (2018) <sup>100</sup>      | 28.5 | 25.7 | 31.2 | 0.0215 | 99.6 |
| Zhang (2020) <sup>101</sup>      | 28.6 | 25.9 | 31.3 | 0.0215 | 99.6 |
| Zhao (2018) <sup>102</sup>       | 28.3 | 25.5 | 31.0 | 0.0214 | 99.6 |
| Zheng (2008) <sup>103</sup>      | 28.1 | 25.4 | 30.8 | 0.0208 | 99.6 |
| Zheng (2016) <sup>104</sup>      | 28.4 | 25.7 | 31.1 | 0.0215 | 99.6 |
| Zhong (2011) <sup>105</sup>      | 28.3 | 25.6 | 31.1 | 0.0214 | 99.6 |
| Zhou (2003) <sup>106</sup>       | 28.3 | 25.6 | 31.1 | 0.0215 | 99.6 |
| Zhou (2009) <sup>107</sup>       | 28.6 | 25.9 | 31.4 | 0.0216 | 99.6 |
| Zhou (2018) <sup>108</sup>       | 28.6 | 25.9 | 31.4 | 0.0216 | 99.6 |
| Zhu (2019) <sup>109</sup>        | 28.4 | 25.6 | 31.1 | 0.0211 | 99.6 |
| Zong (2010) <sup>110</sup>       | 28.5 | 25.8 | 31.2 | 0.0215 | 99.6 |
| Zou (2007) <sup>111</sup>        | 28.5 | 25.8 | 31.3 | 0.0215 | 99.6 |
| Zou & Sun (2018) <sup>112</sup>  | 28.6 | 25.9 | 31.4 | 0.0215 | 99.6 |
| Zou & Wang (2018) <sup>113</sup> | 28.6 | 25.9 | 31.3 | 0.0215 | 99.6 |

---

**Appendix-Fig. 1** Forest plot of the 113 studies (Studies of 1-40)

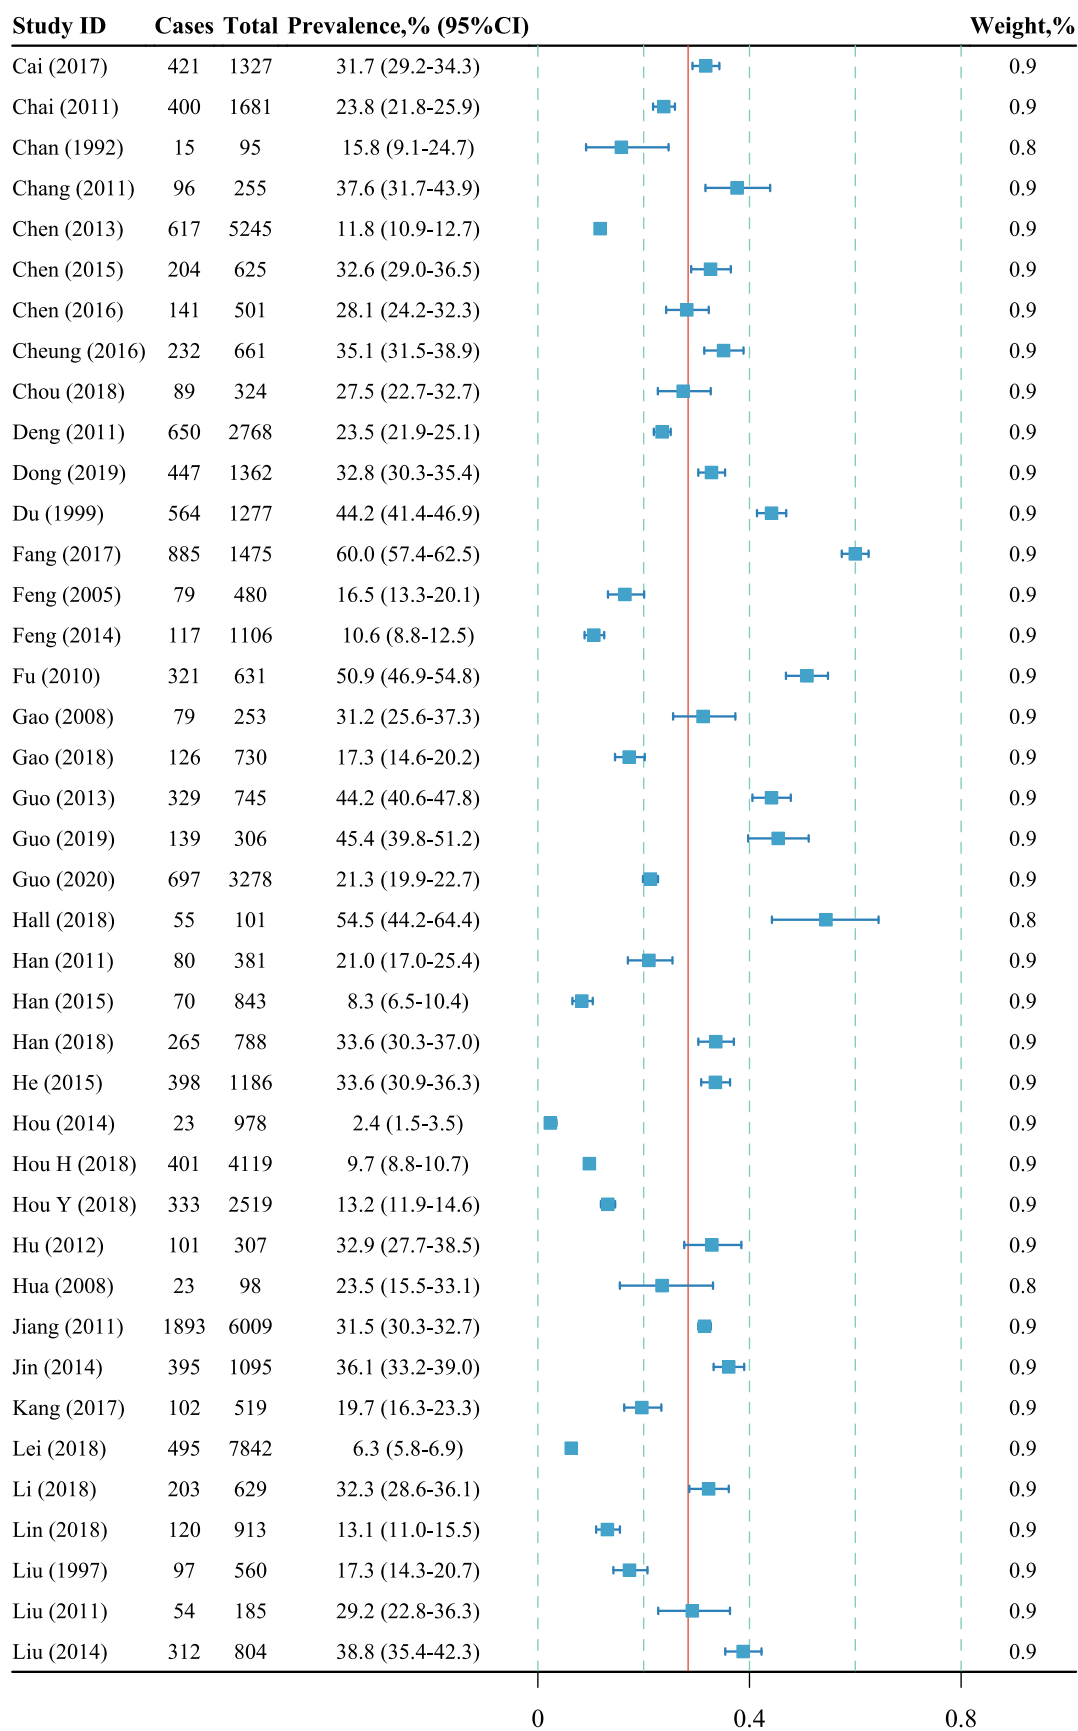

**Appendix-Fig. 2** Forest plot of the 113 studies (Studies of 41-80)

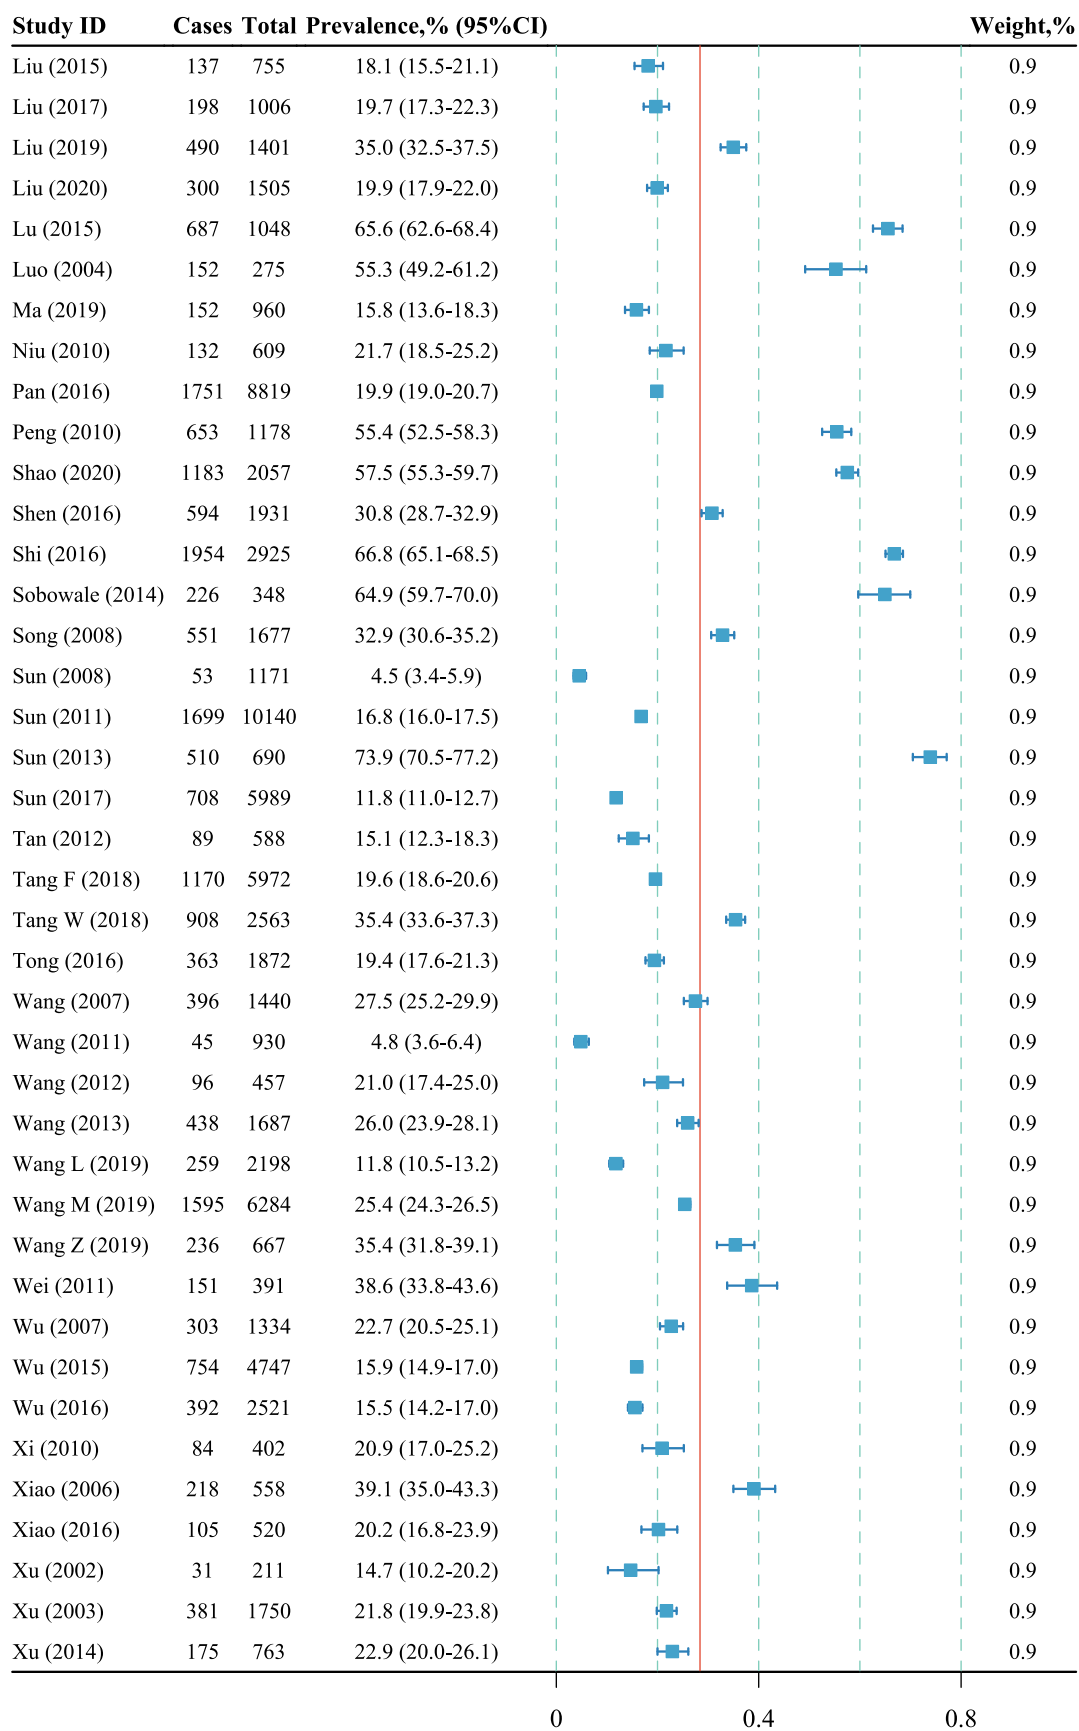

**Appendix-Fig. 3** Forest plot of the 113 studies (Studies of 81-113)

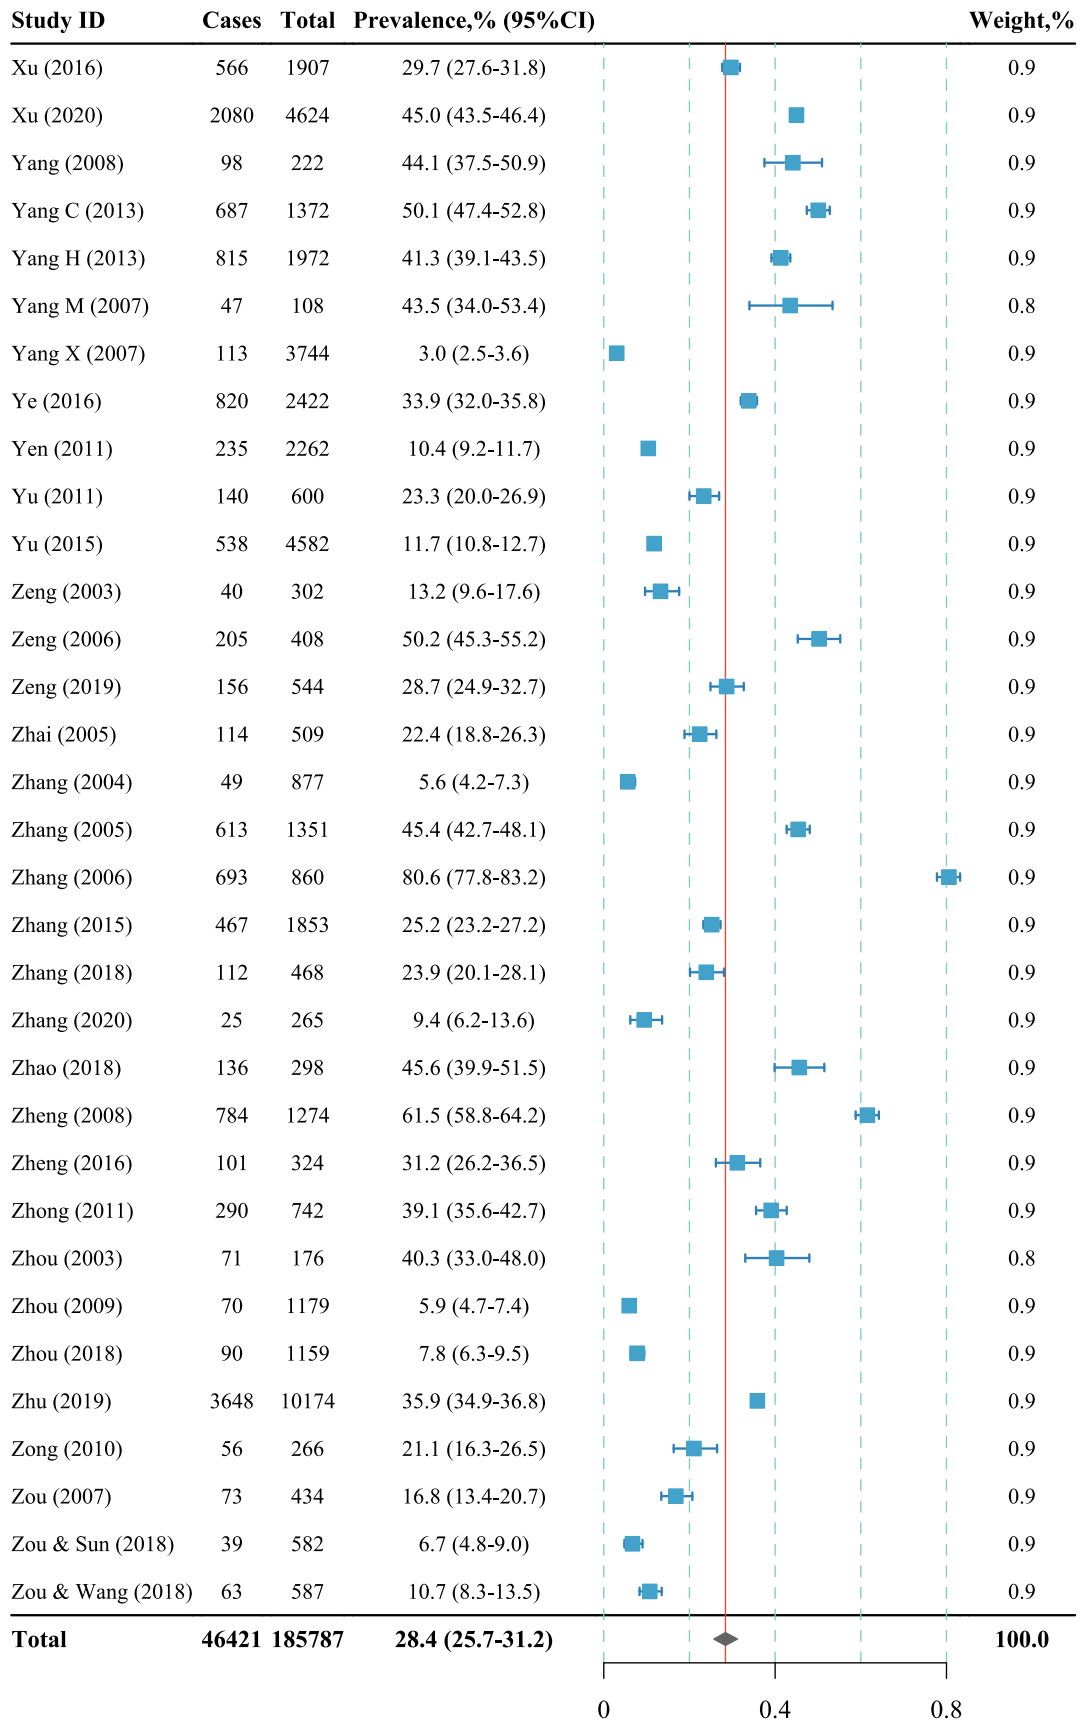

Appendix-Fig. 4 Subgroup analysis of gender

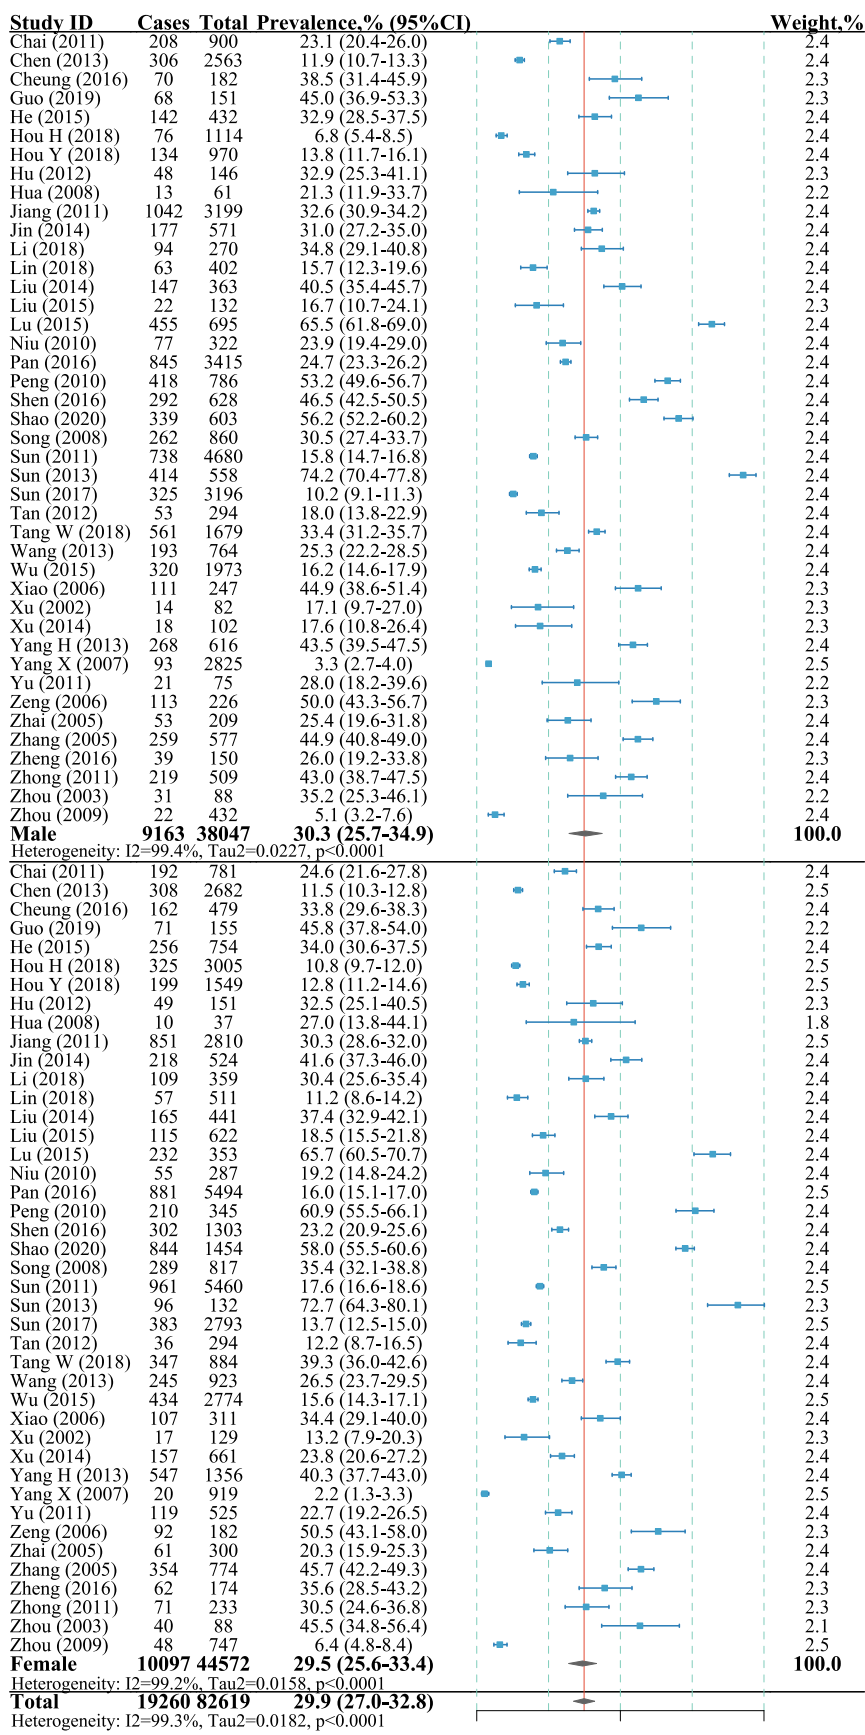



Appendix-Fig. 5 Subgroup analysis of family origin

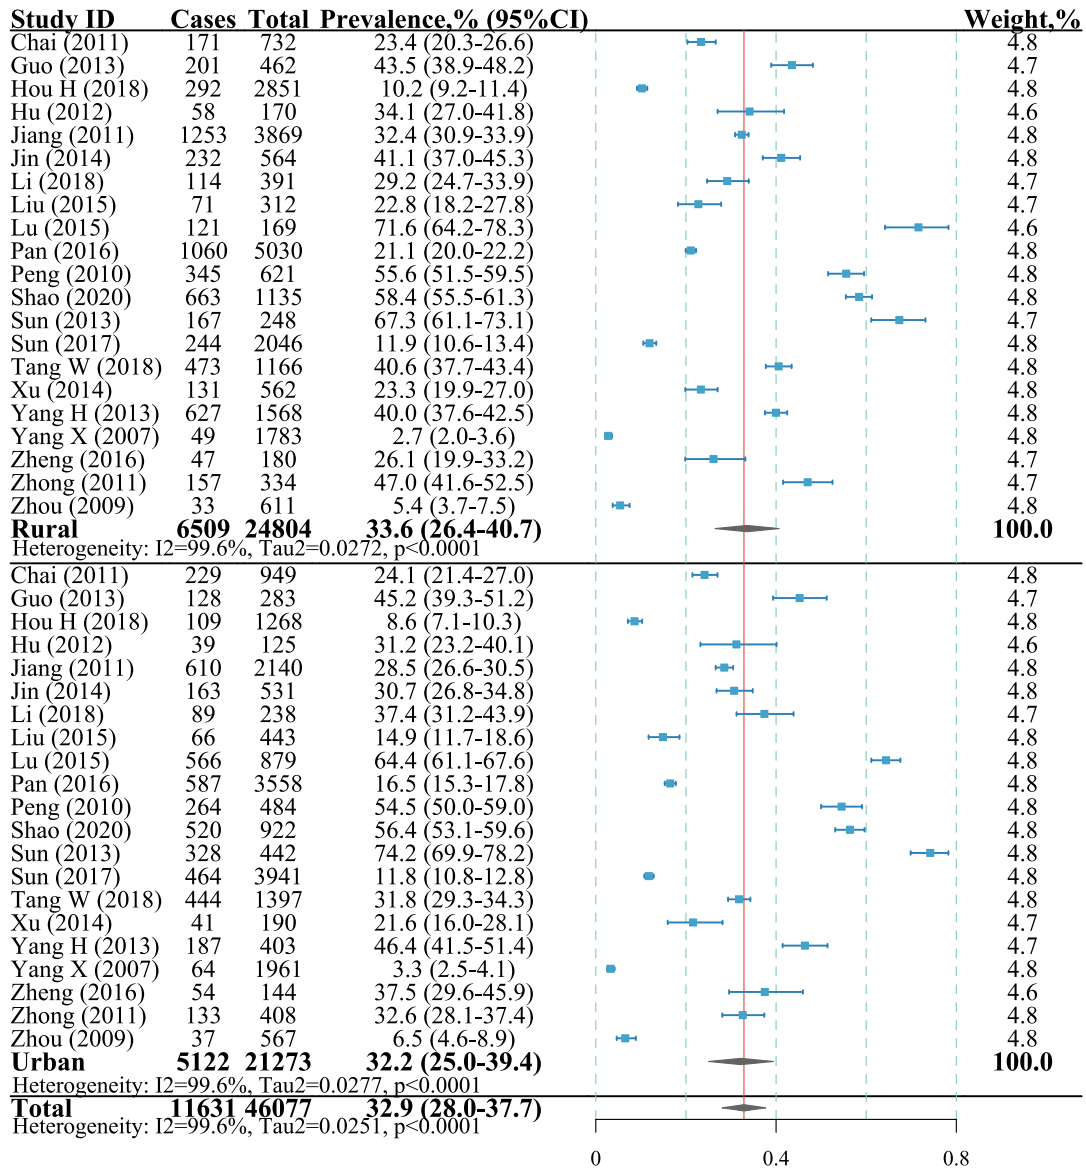

**Appendix-Fig. 6** Subgroup analysis of academic grade

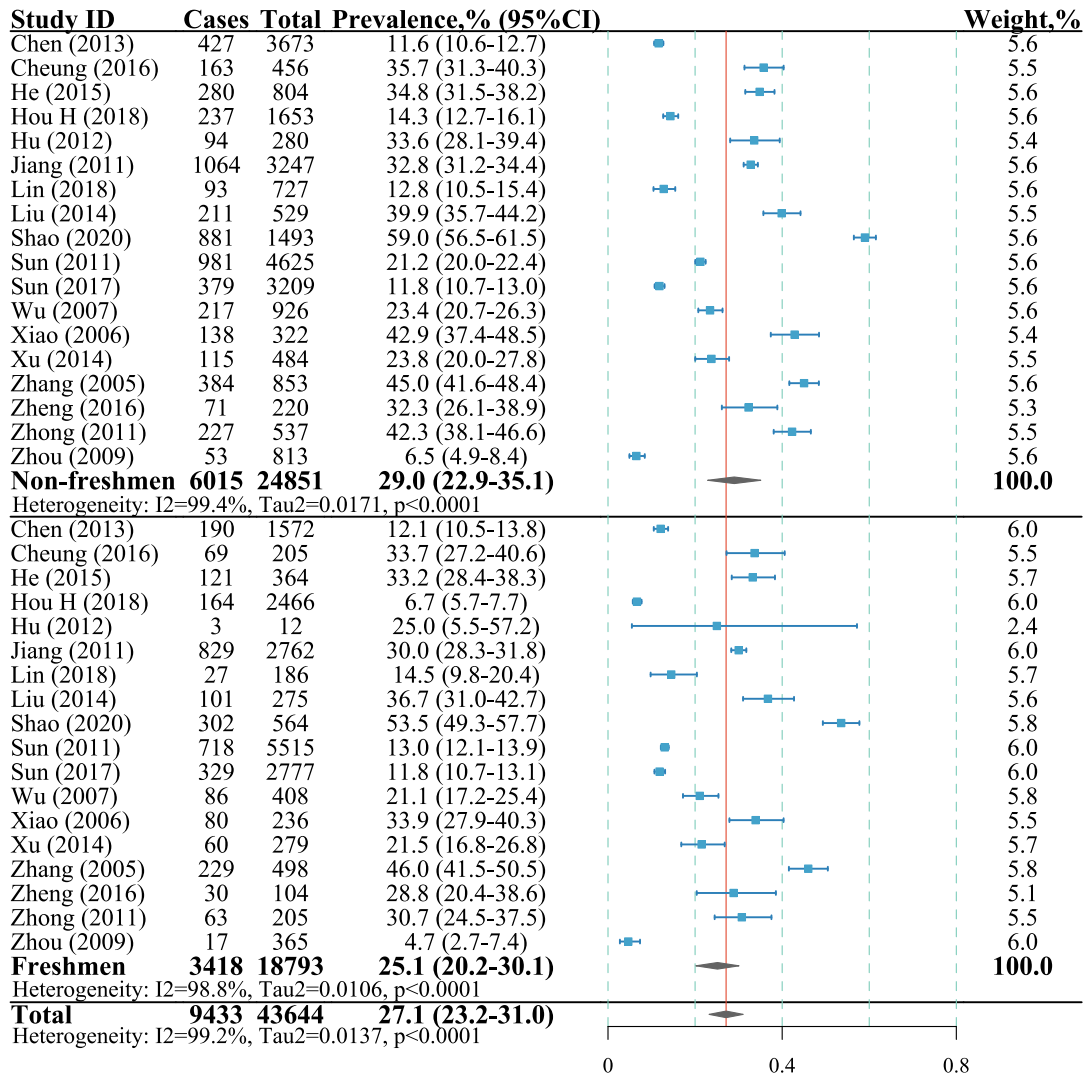

**Appendix-Fig. 7** Subgroup analysis of only-child or not

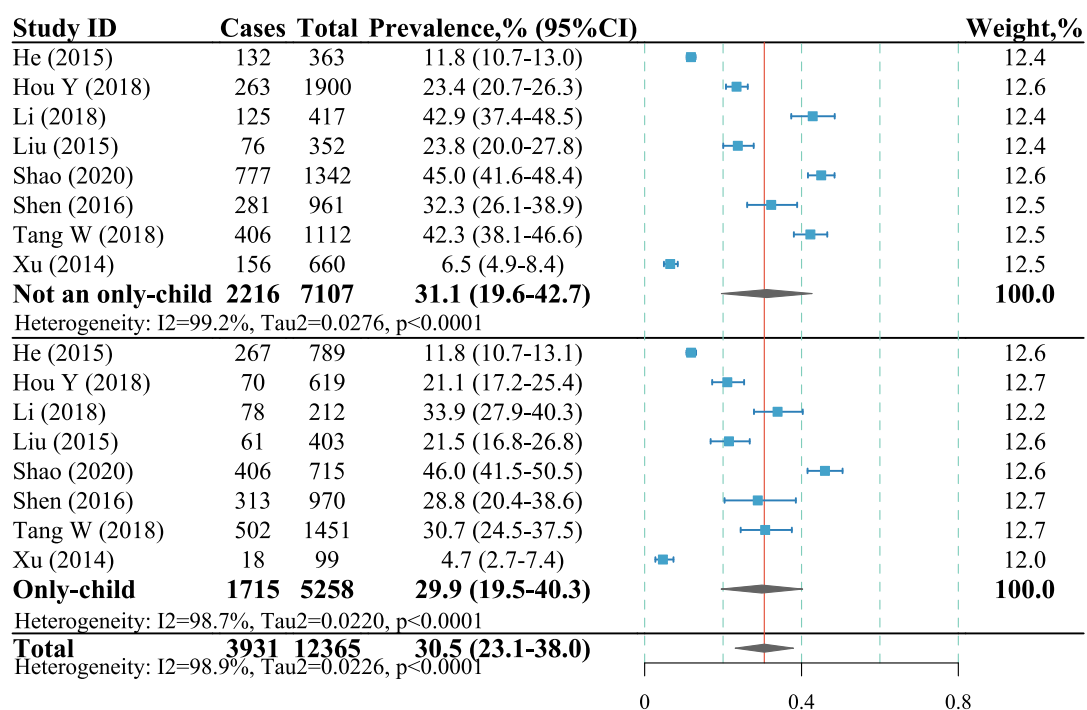

**Appendix-Fig. 8** Subgroup analysis of ethnic group

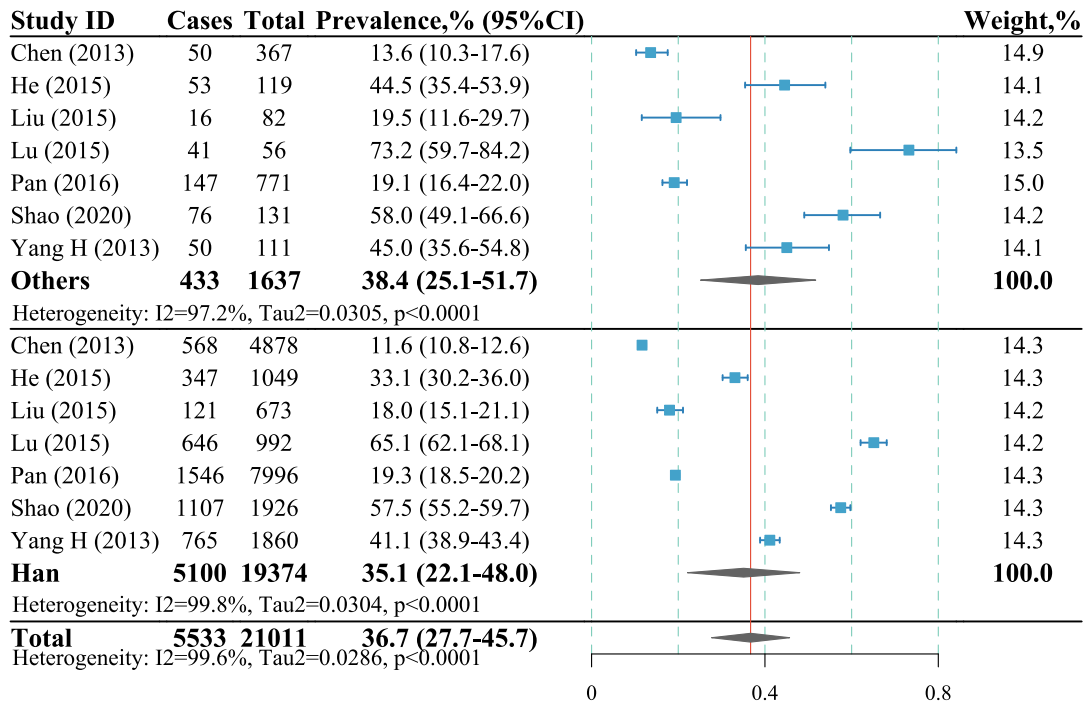

**Appendix-Fig. 9** Subgroup analysis of medical students or not

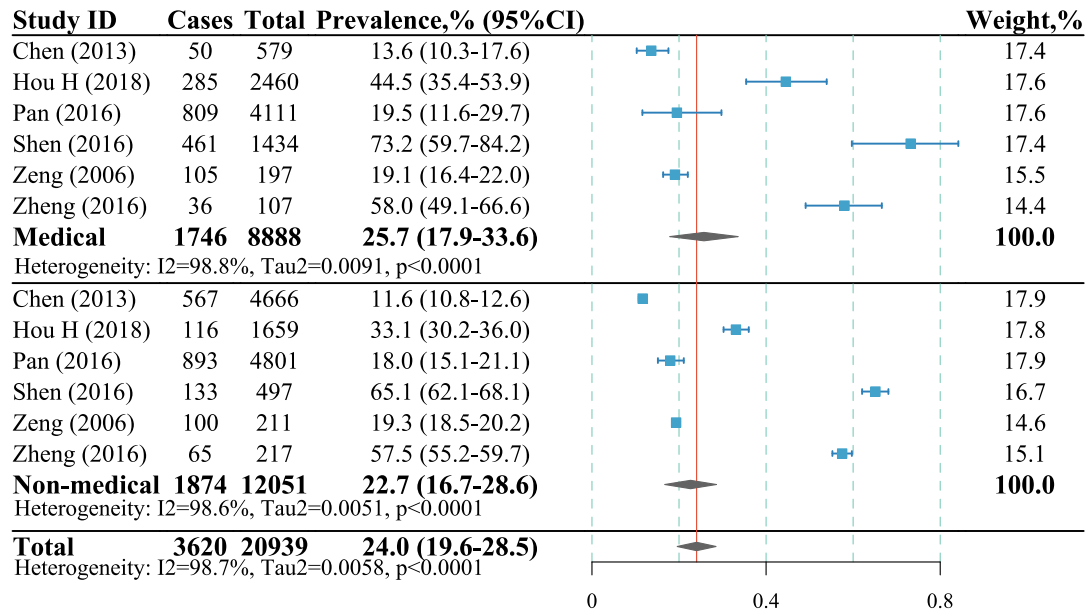

**Appendix-Fig. 10** Subgroup analysis of dating relationship

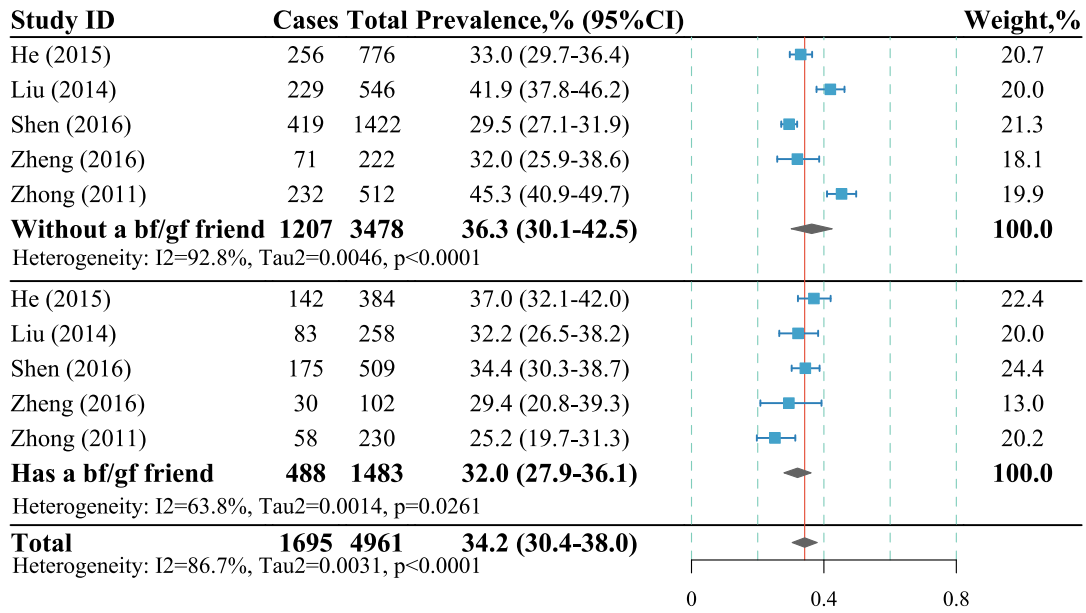

**Appendix-Fig. 11** Subgroup analysis of religious belief

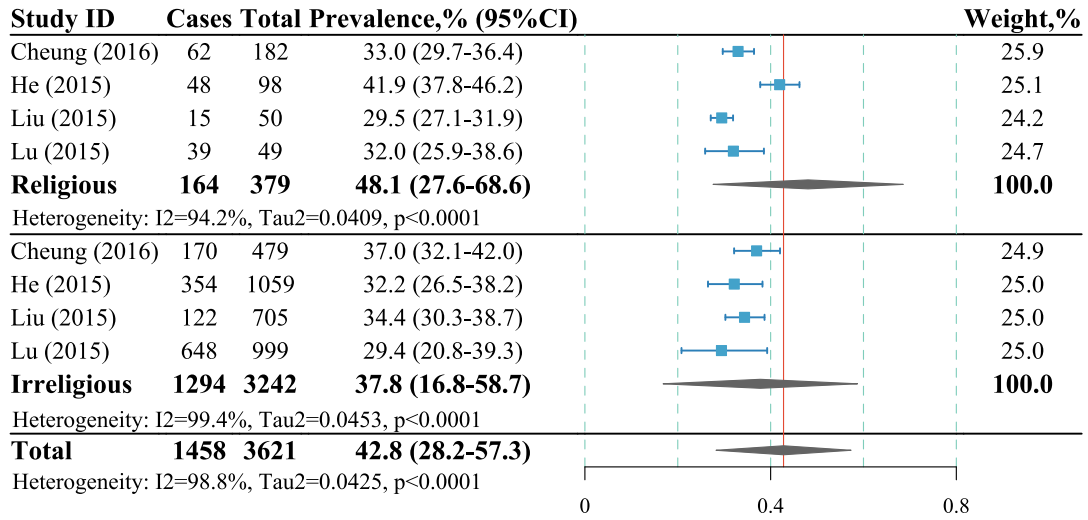

**Appendix-Fig. 12** Subgroup analysis of left-behind experiences on childhood

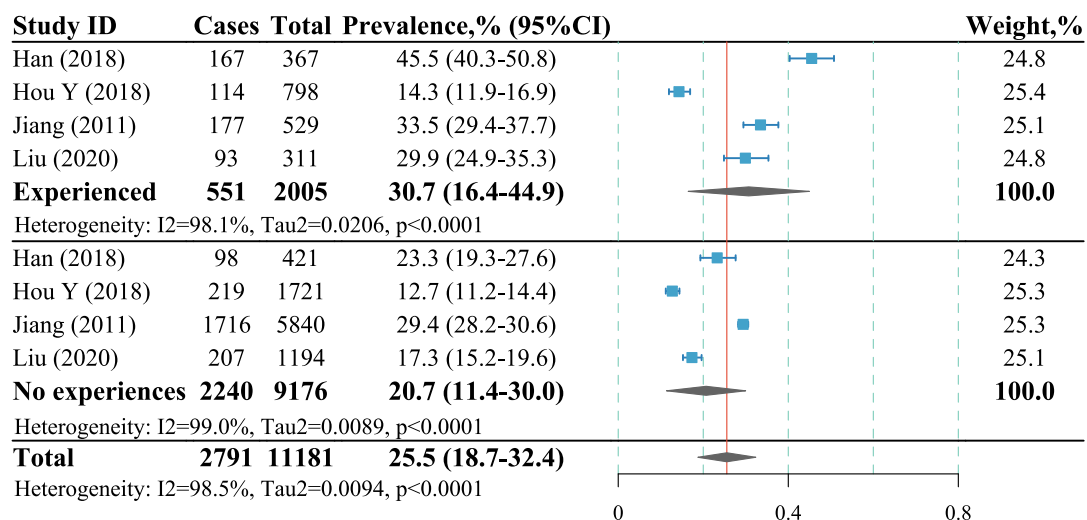



**Appendix-Fig. 13** Subgroup analysis of educational level of father

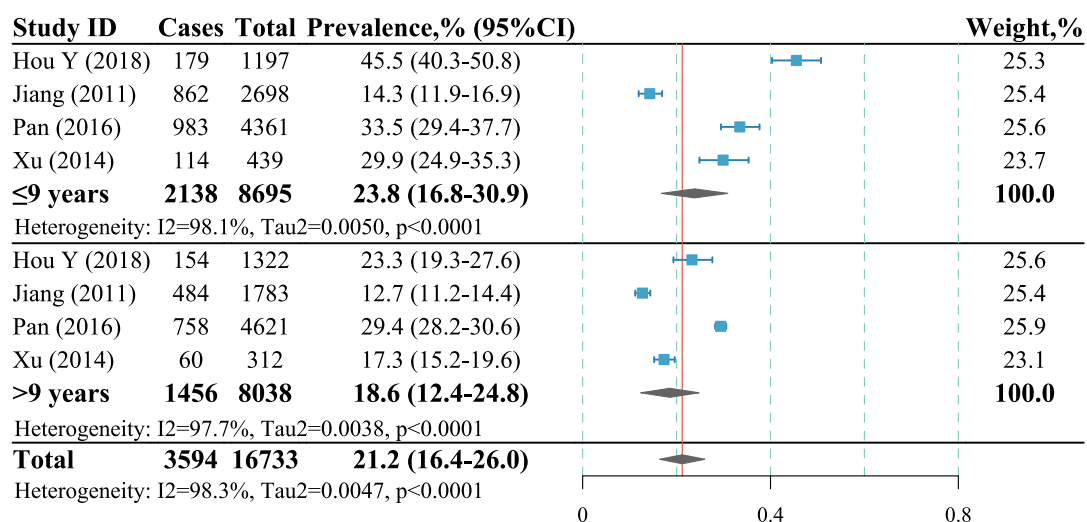

**Appendix-Fig. 14** Subgroup analysis of educational level of mother

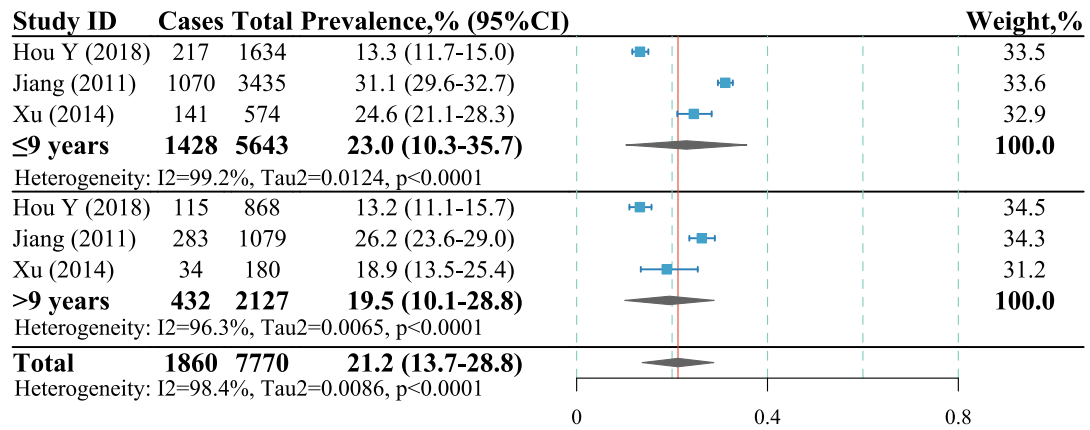

**Appendix-Fig. 15** Subgroup analysis of smoking or not

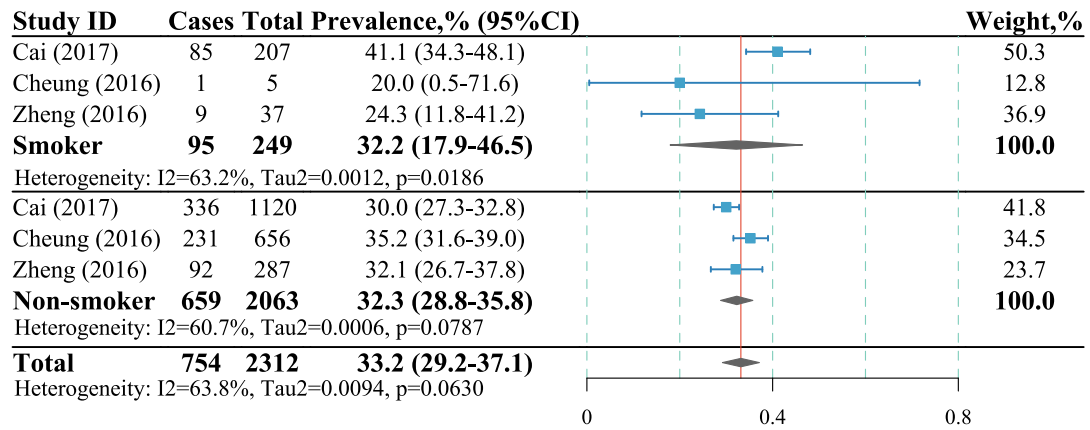

## References

- 1 Cai, L. *et al.* Social smoking and mental health among Chinese male college students. *Am J Health Promot* **31**, 226-231, doi:10.4278/ajhp.141001-QUAN-494 (2017).
- 2 Chai, X. Investigation and research on depression of college students in our university. *Journal of Yangtze University (Nat Sci Edit)* **8**, 198-200, doi:10.3969/j.issn.1673-1409.2011.01.074 (2011).
- 3 Chan, D. W. Coping with depressed mood among Chinese medical students in Hong-kong. *Journal of Affective Disorders* **24**, 109-116, doi:10.1016/0165-0327(92)90025-2 (1992).
- 4 Chang, S. M., Law, D. W. & Chang, H. K. The impact of personality on depression among university students in Taiwan. *Chang Gung Med J* **34**, 528-535 (2011).
- 5 Chen, L. *et al.* Depression among Chinese university students: prevalence and socio-demographic correlates. *PLOS ONE* **8**, doi:10.1371/journal.pone.0058379 (2013).
- 6 Chen, C. J. *et al.* The prevalence and related factors of depressive symptoms among junior college nursing students: a cross-sectional study. *Journal of Psychiatric and Mental Health Nursing* **22**, 590-598, doi:10.1111/jpm.12252 (2015).
- 7 Chen, L. *et al.* Relationship between personality characteristics, constitutions of traditional chinese medicine and depression in undergraduate *Chinese General Practice* **19**, 4124-4129, doi:10.3969/j.issn.1007-9572.2016.33.021 (2016).
- 8 Cheung, T. *et al.* Depression, anxiety and symptoms of stress among baccalaureate nursing students in Hong Kong: A cross-sectional study. *Int J Environ Res Public Health* **13**, doi:10.3390/ijerph13080779 (2016).
- 9 Chou, W.-P., Yen, C.-F. & Liu, T.-L. Predicting effects of psychological inflexibility/experiential avoidance and stress coping strategies for internet addiction, significant depression, and suicidality in college students: A prospective study. *International journal of environmental research and public health* **15**, 788, doi:10.3390/ijerph15040788 (2018).
- 10 Deng, F. *et al.* Early menarche and psychopathological symptoms in young Chinese women. *Journal of Womens Health* **20**, 207-213, doi:10.1089/jwh.2010.2102 (2011).
- 11 Dong, Y. & Li, H. The relationship between social support and depressive symptoms among the college students of Liaoning, China: a moderated mediated analysis. *Psychology Health & Medicine*, doi:10.1080/13548506.2019.1679844 %/ routledge journals, taylor & francis ltd (2019).
- 12 Du, Z. & Wang, K. An epidemiological study on depression in 1597 undergraduates. *Chinese Journal of Behavioral Medical Science* **8**, 14-15 (1999).
- 13 Fang, H., Cui, W. & Fan, H. The relationship between frustration events, anti-frustration ability and college studentg depressions *China Journal of Health*

- Psychology* **25**, 1089-1092 (2017).
- 14 Feng, G., Chen, J. & Yang, X. Study on the status and quality of sleep-related influencing factors in medical college students. *Chinese Journal of Epidemiology* **26**, 328-331 (2005).
- 15 Feng, Q., Zhang, Q.-l., Du, Y., Ye, Y.-l. & He, Q.-q. Associations of physical activity, screen time with depression, anxiety and sleep quality among Chinese college freshmen. *PLOS ONE* **9**, doi:10.1371/journal.pone.0100914 (2014).
- 16 Fu, G. The relationship between undergraduate students' social supports and depression. *Medicine and Society* **23**, 83-84 (2010).
- 17 Gao, G. *et al.* Relationship between depression and network *Practical Preventive Medicine* **15**, 301-303, doi:10.3969/j.issn.1006-3110.2008.02.003 (2008).
- 18 Gao, T. *et al.* Prevalence and correlates of suicidal behaviors among college students in northeastern China: a cross-sectional study. *Psychiatr Q* **89**, 359-370, doi:10.1007/s11126-017-9540-9 (2018).
- 19 Guo, Y., Zhang, N. & Zhang, J. Comparison of positive psychological quality and its influencing factors among nursing students from rural and urban areas. *Chinese Journal of Public Health* **29**, 1041-1045, doi:10.11847/zgggws2013-29-07-33 (2013).
- 20 Guo, M. *et al.* Correlation analysis of acne incidence, emotion and physical constitution among college students in Fuzhou. *Guiding Journal of Traditional Chinese Medicine and Pharmacy* **25**, 85-88 (2019).
- 21 Guo, F., Tian, Y., Cui, Y. & Huang, C. Night-eating syndrome and depressive symptoms in college freshmen: Fitness improvement tactics in youths (FITYou) project. *Psychology Research and Behavior Management* **13**, 185-191, doi:10.2147/PRBM.S234025 %/ © 2020 Guo et al. (2020).
- 22 Hall, B. J. *et al.* An evaluation of a low intensity mHealth enhanced mindfulness intervention for Chinese university students: A randomized controlled trial. *Psychiatry Research* **270**, 394-403, doi:10.1016/j.psychres.2018.09.060 (2018).
- 23 Han, H. Analysis and countermeasures of SDS for students majoring in arts in universities. *Dushi Jiajiao*, 65 (2011).
- 24 Han, Y. *et al.* Reason analysis and prevention of depression among students in a medical college. *Journal of Shenyang Medical College* **17**, 56-57, doi:10.3969/j.issn.1008-2344.2015.01.021 (2015).
- 25 Han, L., Zhao, S. Y., Pan, X. Y. & Liao, C. J. The impact of students with left-behind experiences on childhood: The relationship between negative life events and depression among college students in China. *Int J Soc Psychiatry* **64**, 56-62, doi:10.1177/0020764017739332 (2018).
- 26 He, H. & Luo, Y. Analysis on depression status and influence factors of university students in Beijing. *Modern Preventive Medicine* **42**, 1261-1264 (2015).
- 27 Hou, X., Chen, K. & Yu, Q. Investigation and analysis of mental health status of freshmen in a medical college. *Guide of China Medicine* **12**, 358-359 (2014).
- 28 Hou, H. *et al.* Suboptimal health status and psychological symptoms among Chinese college students: a perspective of predictive, preventive and

- personalised health. *EPMA Journal* **9**, 367-377, doi:10.1007/s13167-018-0148-4 (2018).
- 29 Hou, Y., Chen, Y. & Zhang, X. Revalence of depressive symptom and associated family factors among college students. *Modern Preventive Medicine* **45**, 471-475 (2018).
- 30 Hu, L. & Tang, X. Study on the relationship between depression and family closeness and adaptability in college students. *Journal of Shangrao Normal University* **32**, 91-94, doi:10.3969/j.issn.1004-2237.2012.01.020 (2012).
- 31 Hua, Y. Analysis of depression and mental health of college students. *Scientific Information (Academic Research)*, 356-358 (2008).
- 32 Jiang, D., Yao, R., Yuan, Z. & Tao, F. Analysis of depression and anxiety among bengbu university students and its influencing factors. *Journal of Hygiene Research* **40**, 541-543 (2011).
- 33 Jin, P., Yu, J. & Lu, S. Analysis of depression of students of three private colleges in Nanjing city. *Occupation and Health* **30**, 3586-3588 (2014).
- 34 Kang, C. A study on the effect of psychological nursing intervention on college students' depression. *Guide of China Medicine* **15**, 290-291 (2017).
- 35 Lei, X. *et al.* Measurement equivalence of the 10-item ruminative response scale across groups with screen-negative or screen-positive depressive symptoms. *Chinese Journal of Clinical Psychology* **26**, 39-42, doi:10.16128/j.cnki.1005-3611.2018.01.009 (2018).
- 36 Li, L., Wan, L. & Zhao, S. Characteristics and influencing factors of depression of college students. *Journal of Qiannan Normal University for Nationalities* **38**, 81-84 (2018).
- 37 Lin, F. *et al.* Depression and its influencing factors in medical students. *China Journal of Health Psychology* **26**, 622-627 (2018).
- 38 Liu, X., Tang, M., Hu, L., Wang, A. & Li, C. A study on the correlation between anxiety, depression and sleep quality in college students. *Chinese Mental Health Journal* **11**, 26-28 (1997).
- 39 Liu, B. *et al.* Study about related factors of depression and anxiety in university freshmen in Shandong province. *Journal of Psychiatry* **24**, 100-102 (2011).
- 40 Liu, A. Analysis of depression symptoms and its influencing factors in college students of Hunan university of science and technology. *Journal of Hygiene Research* **43**, 508-511 (2014).
- 41 Liu, Y. *et al.* A survey on depression in college students and influencing factors *Chinese Journal of General Practice* **13**, 91-93 (2015).
- 42 Liu, Y. *et al.* Problematic smart phone use and its relation with anxiety and depression: a survey in a large sample of undergraduates *Chinese Journal of Psychiatry* **50**, 270-275, doi:10.3760/cma.j.issn.1006-7884.2017.04.008 (2017).
- 43 Liu, X., Ping, S. & Gao, W. Changes in undergraduate students' psychological well-being as they experience university life. *International Journal of Environmental Research and Public Health* **16**, doi:10.3390/ijerph16162864 (2019).
- 44 Liu, H. *et al.* The influence of left-behind experience on college students' mental

- health: A cross-sectional comparative study. *International Journal of Environmental Research and Public Health* **17**, 1511, doi:10.3390/ijerph17051511 (2020).
- 45 Lu, W. *et al.* Prevalence and related risk factors of anxiety and depression among Chinese college freshmen. *Journal of Huazhong University of Science and Technology-Medical Sciences* **35**, 815-822, doi:10.1007/s11596-015-1512-4 (2015).
- 46 Luo, H. & Ma, J. Relation among college student's depression symptom, problem solving appraisal and perceived stress. *Chinese Journal of Clinical Psychology* **12**, 367-368 (2004).
- 47 Ma, H. *et al.* Study on the relationships of depressive symptoms with personality traits and coping style of undergraduates. *Chinese Journal of Health Education* **35**, 179-181, doi:10.16168/j.cnki.issn.1002-9982.2019.02.018 (2019).
- 48 Niu, R., Jiang, G.-l. & Fang, Z.-y. Status of coping style, anxiety and depression of college freshmen and their relationship. *Chinese Journal of Health Education* **26**, 548-550 (2010).
- 49 Pan, X.-F. *et al.* Prevalence of depressive symptoms and its correlates among medical students in China: a national survey in 33 universities. *Psychology Health & Medicine* **21**, 882-889, doi:10.1080/13548506.2015.1127395 (2016).
- 50 Peng, M. *et al.* Employment-related anxiety and depression in senior college students in China. *Zhong Nan Da Xue Xue Bao Yi Xue Ban* **35**, 194-202, doi:10.3969/j.issn.1672-7347.2010.03.002 (2010).
- 51 Shao, R. *et al.* Prevalence of depression and anxiety and correlations between depression, anxiety, family functioning, social support and coping styles among Chinese medical students. *BMC psychology* **8**, 1-19, doi:10.1186/s40359-020-00402-8 (2020).
- 52 Shen, J. *et al.* The depression condition and influencing factors of college students in Xuzhou city. *Chinese Journal of Prevention and Control of Chronic Diseases* **24**, 890-893, doi:10.16386/j.cjpcd.issn.1004-6194.2016.12.003 (2016).
- 53 Shi, M., Liu, L., Wang, Z. Y. & Wang, L. Prevalence of depressive symptoms and its correlations with positive psychological variables among Chinese medical students: an exploratory cross-sectional study. *BMC Psychiatry* **16**, doi:10.1186/s12888-016-0710-3 (2016).
- 54 Sobowale, K., Zhou, N., Fan, J., Liu, N. & Sherer, R. Depression and suicidal ideation in medical students in China: a call for wellness curricula. *Int J Med Educ* **5**, 31-36, doi:10.5116/ijme.52e3.a465 (2014).
- 55 Song, Y. *et al.* Depression in college: depressive symptoms and personality factors in Beijing and Hong Kong college freshmen. *Comprehensive Psychiatry* **49**, 496-502, doi:10.1016/j.comppsy.2008.02.005 (2008).
- 56 Sun, D., Zhu, L. & Yang, H. Survey and analyses on mental health of freshmen and seniors in medical schools. *Journal of the Fourth Military Medical University* **29**, 705-707 (2008).
- 57 Sun, L. *et al.* Correlations between psychological symptoms and social

- relationships among medical undergraduates in Anhui province of China. *International Journal of Psychiatry in Medicine* **42**, 29-47, doi:10.2190/PM.42.1.c (2011).
- 58 Sun, L. Analysis of the distribution of depression among college students. *Journal of Hubei University of Economics (Humanities and Social Sciences)* **10**, 153-154 (2013).
- 59 Sun, X.-j., Niu, G.-f., You, Z.-q., Zhou, Z.-k. & Tang, Y. Gender, negative life events and coping on different stages of depression severity: A cross-sectional study among Chinese university students. *Journal of Affective Disorders* **209**, 177-181, doi:10.1016/j.jad.2016.11.025 (2017).
- 60 Tan, X., Lu, X. & Fu, Y. Investigation on anxiety and depression of vocational college students. *Daguan Weekly* **562**, 132 (2012).
- 61 Tang, F., Byrne, M. & Qin, P. Psychological distress and risk for suicidal behavior among university students in contemporary China. *Journal of Affective Disorders* **228**, 101-108, doi:10.1016/j.jad.2017.12.005 (2018).
- 62 Tang, W. & Dai, Q. Depressive symptoms among first-year Chinese undergraduates: The roles of socio-demographics, coping style, and social support. *Psychiatry Research* **270**, 89-96, doi:10.1016/j.psychres.2018.09.027 (2018).
- 63 Tong, L. *et al.* Mediating effect of anxiety and depression on the relationship between Attention-deficit/hyperactivity disorder symptoms and smoking/drinking. *Scientific Reports* **6**, doi:10.1038/srep21609 (2016).
- 64 Wang, T., Wang, N., Hu, H., Feng, Z. & Liu, Y. Relationship of depression, automatic thoughts and personality in medical college students. *Journal of Third Military Medical University* **29**, 442-444 (2007).
- 65 Wang, Y., Wang, H. & Li, J. Mental status of undergraduates in Shenyang *Journal of Clinical Psychiatry* **21**, 393-394 (2011).
- 66 Wang, Q., Wang, H. & Zhao, J. Effects of self-concept and coping-style on depression of undergraduates. *China Journal of Health Psychology* **20**, 273-276 (2012).
- 67 Wang, J. *et al.* Correlation analysis between depressed mood and life events among medical college students. *Journal of Wannan Medical College* **32**, 151-153 (2013).
- 68 Wang, L. *et al.* Professional identity and mental health of rural-oriented tuition-waived medical students in Anhui Province, China. *BMC Medical Education* **19**, doi:10.1186/s12909-019-1603-1 (2019).
- 69 Wang, M. *et al.* Prevalence and correlates of suicidal ideation among college students: A mental health survey in Jilin Province, China. *Journal of Affective Disorders* **246**, 166-173, doi:10.1016/j.jad.2018.12.055 (2019).
- 70 Wang, Z., Xu, S. & Duan, H. Investigation and analysis of anxiety and depression among female nursing students -- a case study of two colleges in northwest China. *Technology & Management*, 33-35 (2019).
- 71 Wei, Y., Yan, Y., Lin, R. & Liu, L. Correlation between depression and sleep quality among college students in Fuzhou city. *Chinese Journal of School*



- Doctor* **25**, 172-173 (2011).
- 72 Wu, Z., Zhang, H., Xu, J., Wang, J. & Wang, J. Correlation between anxiety, depression and personality among female college students in Anhui province. *Chinese Journal of School Health* **28**, 232-234, doi:10.3969/j.issn.1000-9817.2007.03.031 (2007).
- 73 Wu, X., Tao, S., Zhang, Y., Zhang, S. & Tao, F. Low physical activity and high screen time can increase the risks of mental health problems and poor sleep quality among Chinese college students. *PLOS ONE* **10**, doi:10.1371/journal.pone.0119607 (2015).
- 74 Wu, X. *et al.* Impact of screen time on mental health problems progression in youth: a 1-year follow-up study. *BMJ Open* **6**, e011533, doi:10.1136/bmjopen-2016-011533 (2016).
- 75 Xi, M. Depression status of the students in Xingtai university and its cause analysis. *Journal of Xingtai University* **25**, 12-13 (2010).
- 76 Xiao, W., Zhou, H., Xia, Y., Yuan, J. & Yan, Q. Depression status and its risk factors among the college students. *Chinese Journal of Behavioral Medicine and Brain Science* **15**, 647-649 (2006).
- 77 Xiao, J. *et al.* 'Weakest Link' as a Cognitive Vulnerability Within the Hopelessness Theory of Depression in Chinese University Students. *Stress and Health* **32**, 20-27, doi:10.1002/smi.2571 (2016).
- 78 Xu, L., Guan, W., Wei, X., Li, W. & Sun, X. Investigation and analysis of anxiety and depression among junior medical college students. *China Journal of Health Psychology* **10**, 24-25 (2002).
- 79 Xu, Y., Zhu, X., Zhao, J. & Liu, L. Investigation and analysis of mental health status of 1750 college students. *Chinese Journal of Primary Medicine and Pharmacy* **10**, 113 (2003).
- 80 Xu, Y. *et al.* Prevalence and correlates of depression among college nursing students in China. *Nurse Educ Today* **34**, e7-12, doi:10.1016/j.nedt.2013.10.017 (2014).
- 81 Xu, Y., Qi, J., Yang, Y. & Wen, X. The contribution of lifestyle factors to depressive symptoms: A cross-sectional study in Chinese college students. *Psychiatry Research* **245**, 243-249, doi:10.1016/j.psychres.2016.03.009 (2016).
- 82 Xu, H. *et al.* Beverages consumption, sleep quality and depressive symptoms in Chinese university students: a latent variable mediation model. *Chinese Journal of School Health* **41**, 16-20, doi:10.16835/j.cnki.1000-9817.2020.01.005 (2020).
- 83 Yang, S., Liang, X., Li, J. & Gong, X. Investigation on depression of "left-behind" college students in a university. *Chinese Journal of School Health* **29**, 51-52 (2008).
- 84 Yang, C. *et al.* Analysis on suicide ideation and its risk factors among medical college students. *Chinese Journal of Social Medicine* **30**, 193-195 (2013).
- 85 Yang, H., Chen, Y. & Chou, Y. Epidemiologic survey on the depressive symptoms of college freshmen *Modern Preventive Medicine* **40**, 3340-3342 (2013).
- 86 Yang, M., Du, J. & Wang, X. Comparative research of depressive emotion

- between college students and social youths with the same age as college students. *China Journal of Health Psychology* **15**, 400-402, doi:10.3969/j.issn.1005-1252.2007.05.005 (2007).
- 87 Yang, X. An epidemiological investigation of depression among 3744 freshmen. *China Journal of Health Psychology* **15**, 499-501 (2007).
- 88 Ye, Y.-l. *et al.* Associations between multiple health risk behaviors and mental health among Chinese college students. *Psychology Health & Medicine* **21**, 377-385, doi:10.1080/13548506.2015.1070955 (2016).
- 89 Yen, J. Y., Yen, C. F., Wu, H. Y., Huang, C. J. & Ko, C. H. Hostility in the real world and online: the effect of internet addiction, depression, and online activity. *Cyberpsychol Behav Soc Netw* **14**, 649-655, doi:10.1089/cyber.2010.0393 (2011).
- 90 Yu, X. Depressive symptoms and related factors analysis in english major college students. *Chinese Journal of Disease Control & Prevention* **15**, 145-148 (2011).
- 91 Yu, Y. *et al.* The role of family environment in depressive symptoms among university students: a large sample survey in China. *PLOS ONE* **10**, doi:10.1371/journal.pone.0143612 (2015).
- 92 Zeng, L. Study on depressed symptom and its influencing factors among sport professional college students. *Chinese Journal of School Doctor* **17**, 393-394 (2003).
- 93 Zeng, Q. *et al.* Analysis on influential factors and prevention way of depression among college students in a certain university. *Practical Preventive Medicine* **13**, 1412-1413 (2006).
- 94 Zeng, Y., Wang, G., Xie, C., Hu, X. & Reinhardt, J. D. Prevalence and correlates of depression, anxiety and symptoms of stress in vocational college nursing students from Sichuan, China: a cross-sectional study. *Psychology Health & Medicine* **24**, 798-811, doi:10.1080/13548506.2019.1574358 (2019).
- 95 Zhai, D., Pan, X., Li, H., Mou, J. & Zhou, X. Survey on psychological and social factors of depression in medical college students. *Chinese Journal of Public Health* **21**, 12-13 (2005).
- 96 Zhang, F., Tang, Q., Deng, Y., Fan, H. & Wang, R. An analysis of mental health status of medical students and its related factors. *Chinese Journal of Clinical Psychology* **12**, 63-65 (2004).
- 97 Zhang, Q. Incidence rate of depression and related factors analysis in undergraduates of different crowd from normal university. *Chinese Journal of Clinical Rehabilitation* **9**, 92-93 (2005).
- 98 Zhang, Z., Wu, C., Liu, G., Fan, C. & Wang, H. Depression and the influencing factors of medical college students in guangzhou. *Chinese Journal of School Health* **27**, 51-52 (2006).
- 99 Zhang, W. *et al.* Exploratory study on relationship between life events and their influence on depressive status of undergraduates. *Chinese Journal of Behavioral Medicine and Brain Science* **24**, 374-377, doi:10.3760/cma.j.issn.1674-6554.2015.04.027 (2015).

- 100 Zhang, M. X., Mou, N. L., Tong, K. K. & Wu, A. M. S. Investigation of the effects of purpose in life, grit, gratitude, and school belonging on mental distress among Chinese emerging adults. *International Journal of Environmental Research and Public Health* **15**, doi:10.3390/ijerph15102147 (2018).
- 101 Zhang, G., Yang, X., Tu, X., Ding, N. & Lau, J. T. F. Prospective relationships between mobile phone dependence and mental health status among Chinese undergraduate students with college adjustment as a mediator. *Journal of Affective Disorders* **260**, 498-505, doi:10.1016/j.jad.2019.09.047 (2020).
- 102 Zhao, S. & Zhang, J. The association between depression, suicidal ideation and psychological strains in college students: a cross-national study. *Cult Med Psychiatry* **42**, 914-928, doi:10.1007/s11013-018-9591-x (2018).
- 103 Zheng, Y. & Zhou, Q. Study on mental health status of college student and its influential factors. *Modern Preventive Medicine* **35**, 4825-4827 (2008).
- 104 Zheng, S., Tong, Q. & Zheng, A. Investigation on depression and anxiety of college students and analysis of related factors. *Chongqing Medicine* **45**, 2835-2837, doi:10.3969/j.issn.1671-8348.2016.20.032 (2016).
- 105 Zhong, S., Tu, W., Shi, X. & Zhang, W. Study on related factors of depression in public security college students. *China Journal of Health Psychology* **19**, 1382-1384 (2011).
- 106 Zhou, R., Yang, C. & Pan, J. Investigation and analysis of depression and related factors among key medical college students in Guangzhou. *Journal of Neuroscience and Mental Health* **3**, 367-368 (2003).
- 107 Zhou, E. *et al.* Correlation between psychosomatic health and depressive symptoms among university students. *Journal of Medical Research* **38**, 50-54, doi:10.3969/j.issn.1673-548X.2009.10.018 (2009).
- 108 Zhou, H., Wan, D. & Liu, L. Mental health status and its correlation with life stress of postgraduates from agricultural universities in China. *Investigacion Clinica* **59**, 359-367 (2018).
- 109 Zhu, Z. *et al.* Frequency of breakfast consumption is inversely associated with the risk of depressive symptoms among Chinese university students: A cross-sectional study. *PLOS ONE* **14**, doi:10.1371/journal.pone.0222014 (2019).
- 110 Zong, J. G. *et al.* Coping flexibility in college students with depressive symptoms. *Health Qual Life Outcomes* **8**, 66, doi:10.1186/1477-7525-8-66 (2010).
- 111 Zou, F. *et al.* A study of psychological education on anxiety and depression of university students. *Chinese Journal of Clinical Psychology* **15**, 557-558 (2007).
- 112 Zou, P. *et al.* Associations between negative life events and anxiety, depressive, and stress symptoms: A cross-sectional study among Chinese male senior college students. *Psychiatry Research* **270**, 26-33, doi:10.1016/j.psychres.2018.09.019 (2018).
- 113 Zou, P. *et al.* Semen quality in Chinese college students: associations with depression and physical activity in a cross-sectional study. *Psychosomatic Medicine* **80**, 564-572, doi:10.1097/psy.0000000000000595 (2018).
